# Supplementary material for: Structural dynamics and stability of corticocortical and thalamocortical axon terminals during motor learning
Source: PLoS One. 2020 Jun 19;15(6):e0234930. doi: 10.1371/journal.pone.0234930 (PMC7304593; doi:10.1371/journal.pone.0234930)
Supplement: S1 Data — (XLSX) [file pone.0234930.s001.xlsx]

## Sheet: BoutonSize(d0)
Fig 2E
M2	3.08008	4.30683	3.2405	3.6918	2.34736	3.78704	3.16555	6.41192	2.37611	2.39555	5.18793	6.65399	3.36423	4.38997	7.55325	4.4278	13.3241	14.1978	6.10075	3.89492	8.09329	3.38778	2.35492	6.54042	10.4139	2.90169	4.8625	2.06662	6.13776	2.497	13.1721	2.09069	3.33209	4.46379	5.15207	5.14395	6.97533	4.52566	5.98014	3.04208	4.42295	3.82892	8.17721	2.92796	5.6031	3.72386	4.34886	5.88491	6.70804
Thalamic	5.64429	7.92634	3.23125	4.10488	2.19018	12.2887	11.1098	2.64883	10.3054	8.92058	13.265	6.50459	14.0018	8.7207	6.31653	2.39375	7.26464	10.2148	4.00482	9.36292	8.25111	2.2022	8.62744	11.9666	5.90814	5.71362	7.09466	3.89942	3.42097	3.15336	11.3486	10.8326	7.64502	6.63112	9.91513	2.93305	7.16921	5.18208	8.61095	11.0194	20.6453	7.28497	8.89988	6.62417	6.44067	7.54451	6.87288	8.3555	3.03332
[truncated: 1,744 more columns]

## Sheet: Performance(RPM)
Fig 3A
		Day 1																				Day 2																				Day 3
	mouse1	28.08	9.765	10.15	39.74	36.715	32.095	34.735	25.935	33.635	33.305	38.53	34.79	35.89	34.625	31.93	34.295	41.775	32.425	35.89	31.215	29.675	25.11	33.305	32.315	49.035	38.09	47.935	37.65	38.53	36.33	34.845	32.37	43.315	39.245	38.255	34.625	35.945	33.085	38.585	28.96	22.415	28.465	33.745	29.785	37.705	34.405	30.72	34.9
	mouse2	5.805	28.52	24.01	29.84	37.54	33.25	40.455	30.445	30.665	26.32	33.36	28.465	27.31	29.235	33.965	25.935	33.305	24.78	27.145	26.65	19.72	30.115	32.59	36.275	26.595	38.64	32.095	39.96	31.655	32.865	39.025	39.135	33.525	32.975	34.955	51.895	47.825	32.92	45.735	32.81	35.065	29.62	43.425	35.12	36.88	56.02	37.705	45.735
	mouse3	14.715	31.27	37.925	38.915	39.08	44.91	44.965	38.475	37.32	40.73	36.825	42.38	27.585	40.07	29.18	39.025	37.98	36.55	39.135	44.635	37.485	35.34	38.42	43.92	42.6	51.345	57.01	51.015	56.845	43.315	39.795	48.155	53.765	44.195	41.72	45.845	48.155	49.365	54.975	43.645	39.465	34.79	38.365	45.735	41.115	47.165	48.65	52.06
	mouse4	20.655	32.59	27.475	36.715	32.755	34.185	33.47	38.31	30.445	33.415	35.89	34.35	32.755	32.975	35.175	42.71	38.475	38.035	39.575	45.185	42.38	25.11	40.675	39.465	47.77	55.58	43.645	39.245	33.69	40.235	38.64	55.36	44.635	62.73	54.59	64.215	37.87	53.05	34.075	41.5	50.85	36.99	30.115	34.955	42.16	53.985	38.75	49.86
	mouse5	20.16	34.57	27.86	28.19	34.075	21.315	32.535	25.77	28.025	28.465	30.665	35.725	28.3	33.58	31.655	31.82	32.59	34.57	31.765	32.7	34.9	40.62	50.19	39.355	46.065	39.52	62.675	37.815	47.935	47.11	48.815	54.15	51.345	41.775	48.925	43.535	45.625	47.495	49.86	40.675	26.045	32.535	41.995	52.005	60.31	50.905	54.975	55.25
	mouse6	27.805	36.715	33.8	43.535	45.625	42.71	41.28	48.32	40.675	43.15	47.88	44.69	53.105	56.79	55.965	41.28	48.045	49.75	46.615	50.685	37.32	33.58	20.985	51.29	61.52	56.79	48.265	47.495	67.68	45.57	44.195	48.375	44.8	70.32	53.05	60.475	62.235	59.485	62.675	46.56	40.07	41.39	49.31	64.49	70.98	50.85	49.31	71.365
	mouse7	25.165	26.1	33.25	33.03	40.895	41.72	38.585	38.365	43.59	43.92	47.165	42.325	40.125	46.67	39.74	37.98	40.895	41.005	42.05	45.68	36.385	30.335	34.185	32.095	37.045	37.32	38.75	41.335	41.28	46.945	51.565	53.49	53.545	41.17	43.04	48.76	41.5	48.155	43.15	48.045	37.705	37.54	32.92	38.75	50.465	46.285	55.03	62.29
	mouse8	19.72	16.035	32.48	33.69	31.93	31.49	25.55	31.49	26.32	34.295	29.84	32.535	34.405	31.93	32.7	34.68	33.195	33.305	35.945	40.84	38.255	36.11	34.57	34.185	38.86	40.51	37.21	31.82	42.49	41.94	44.195	46.615	32.535	40.95	43.81	46.395	42.16	43.205	44.8	42.325	38.75	28.63	35.67	37.98	33.58	35.175	38.035	45.13
[truncated: 92 more columns]

## Sheet: Number
Fig 3C
M2Cont	mouse10	1	1.02778	1.05556	1
	mouse11	1	1.05738	1.06557	1.04918
	mouse12	1	1.03509	1	0.912281
	mouse13	1	1.0198	1	0.950495
	mouse14	1	0.984127	0.936508	1.04762
	mouse15	1	1.05645	1.04839	1.02419
	mouse16	1	1	1.02667	1.01333
	mouse17	1	1.03311	1.00662	1.01987
M2Task	mouse1	1	0.986842	0.960526	0.947368
	mouse2	1	1.13115	1.07377	1.18033
	mouse3	1	1.0202	0.959596	1.0101
	mouse4	1	1	1.00862	0.939655
	mouse5	1	1.08197	1.09836	1.13115
	mouse6	1	1.01124	1.10112	1.11236
	mouse7	1	1	1.02632	0.982456
	mouse8	1	1.00917	1.06422	1.11009
ThCont	mouse10	1	0.974576	0.966102	0.983051
	mouse11	1	0.96875	0.94375	0.925
	mouse12	1	0.957447	1.03191	1.01064
	mouse13	1	1.03409	1.03409	1.03409
	mouse14	1	1.08247	1.01031	0.948454
	mouse18	1	1.04444	1.03333	0.966667
	mouse19	1	1.07407	1.08333	1.07407
	mouse20	1	0.973214	0.982143	0.892857
ThTask	mouse1	1	1.01961	1.02941	0.980392
	mouse2	1	1.06	1.06	1.1
	mouse3	1	0.918605	0.965116	1.01163
	mouse4	1	1.04494	1.04494	1.01124
	mouse5	1	0.991667	0.983333	0.975
	mouse6	1	1.02632	1.01754	1.00877
	mouse7	1	1.03937	1.00787	0.992126

## Sheet: Density
Fig 3D
		d0	d2	d4	d7
M2Cont	mouse10	0.127212	0.126851	0.131352	0.128111
	mouse11	0.0949805	0.100454	0.101858	0.0979247
	mouse12	0.117695	0.123457	0.117491	0.11407
	mouse13	0.0865104	0.0877047	0.0876608	0.0844548
	mouse14	0.103403	0.0978565	0.0951833	0.103518
	mouse15	0.117618	0.123547	0.123511	0.119197
	mouse16	0.101218	0.0983539	0.100553	0.0990938
	mouse17	0.138357	0.142815	0.13842	0.140835
M2Task	mouse1	0.111158	0.108319	0.107177	0.10603
	mouse2	0.104493	0.121644	0.110842	0.123534
	mouse3	0.0945498	0.0976998	0.0925316	0.0979584
	mouse4	0.113285	0.110949	0.111863	0.109258
	mouse5	0.0984705	0.101551	0.109997	0.103841
	mouse6	0.109571	0.108027	0.117755	0.112578
	mouse7	0.101003	0.102684	0.103772	0.0998651
	mouse8	0.101523	0.101568	0.100935	0.104098
ThCont	mouse10	0.106746	0.102442	0.101286	0.105555
	mouse11	0.119347	0.114373	0.111541	0.111317
	mouse12	0.1364	0.134291	0.141423	0.138689
	mouse13	0.11584	0.119695	0.120841	0.120001
	mouse14	0.108214	0.117357	0.11261	0.107997
	mouse18	0.13636	0.141891	0.140292	0.132347
	mouse19	0.107171	0.114009	0.115394	0.116857
	mouse20	0.154024	0.151605	0.152767	0.141659
ThTask	mouse1	0.113203	0.116033	0.116217	0.112364
	mouse2	0.106927	0.113883	0.115417	0.119502
	mouse3	0.119361	0.11256	0.117649	0.123373
	mouse4	0.111752	0.115478	0.116017	0.113793
	mouse5	0.120519	0.114986	0.118552	0.115815
	mouse6	0.126013	0.132399	0.129521	0.127242
	mouse7	0.124589	0.130658	0.1272	0.125671

## Sheet: BoutonSize(vs d0)
Fig 3E
M2Cont				M2Task				ThCont				ThTask
d2	d4	d7		d2	d4	d7		d2	d4	d7		d2	d4	d7
0.822731	1.43065	2.59567		1.20029	1.33221	0.834037		0.719927	1.42832	2.01716		1.12185	1.16184	0.827545
0.748024	1.4771	2.43844		1.31041	1.20873	1.26719		1.11214	1.32733	1.62391		1.02817	1.27491	0.618835
0.988227	1.57939	1.0844		0.669156	0.919639	1.72287		0.703925	1.44459	0.600046		1.04318	1.16381	0.422356
1.10152	3.77249	3.07639		0.739223	0.994099	1.04935		0.863242	0.779982	1.27553		1.01942	0.988952	0.620733
1.22571	1.11298	1.32904		1.24802	0.797745	1.18224		0.795918	0.910269	0.908267		1.24728	0.935241	0.526168
0.420717	0.804592	0.64188		2.01022	1.88072	2.87286		0.620565	0.749844	0.707821		0.869772	0.989887	1.09876
1.02022	1.2101	0.698323		0.922201	2.09363	1.2792		0.436289	0.835846	0.793839		0.713583	1.00603	1.07018
0.817947	1.41709	1.11376		0.829186	1.43339	1.12052		1.41211	1.26664	1.09407		0.704238	0.659428	0.461048
0.985168	0.758853	0.960484		0.377359	0.544909	0.546871		1.26476	1.04946	1.05959		0.632664	0.566048	0.434014
0.946877	1.19131	0.692411		0.931389	1.39463	1.51675		0.777983	0.638399	0.574014		1.10719	1.19256	1.01689
0.796893	0.901592	0.918006		0.835883	1.38177	1.08711		0.663948	0.595504	0.322658		0.26207	0.505074	0.382029
1.0793	1.19126	1.31718		1.39104	1.60884	1.35829		1.19554	1.09378	0.529653		0.792233	0.765782	0.775435
0.793294	0.750746	0.614921		0.540876	1.41147	0.973609		0.623591	0.62418	0.550267		0.650966	0.453282	0.513349
0.836118	0.822494	0.794109		0.805716	1.46717	1.52278		0.882121	0.536492	0.514583		1.82281	2.0224	1.2472
1.29851	1.26644	0.884643		0.807823	0.786929	1.42545		1.57584	1.50005	1.10655		0.880799	1.15773	0.681143
2.53079	2.38567	1.88845		2.6678	2.52444	3.00935		0.88425	0.98735	0.872098		1.0803	0.87827	0.830103
0.617212	0.725695	0.242315		2.3723	2.08349	1.68113		1.17882	1.08996	0.665761		1.0219	0.953973	0.819832
1.08773	0.668862	1.02974		0.838	0.625163	0.937377		0.832126	0.625556	0.432829		1.1691	0.998328	0.972814
0.740957	0.842395	0.979779		1.19939	1.57902	1.61228		1.03404	0.724584	0.719878		1.17492	0.943139	0.897162
0.817122	0.919223	0.819869		0.704375	0.778884	1.05957		1.04531	1.32218	1.521		0.770752	0.666248	0.655221
0.572379	0.750884	0.794736		0.929595	0.961525	1.4068		1.68534	1.92185	2.19926		0.645845	0.945843	0.678067
0.896817	1.09863	1.19839		0.673231	0.62622	0.746827		1.04277	1.117	1.60294		1.08291	0.838797	0.759733
0.737748	0.642634	0.942149		0.955838	1.15534	0.809651		0.694787	0.487874	1.22492		1.24591	1.43813	1.42395
1.80106	1.33692	1.31476		1.12697	0.790011	0.463202		0.905271	1.52324	0.714814		1.72809	1.66385	1.25954
1.18245	1.19953	0.716761		0.8075	0.351544	0.457878		0.91919	1.06535	1.223		1.4763	1.16663	1.05489
0.762672	1.28116	0.931977		0.63157	0.502248	1.0617		0.82454	1.05966	1.27688		0.757273	0.679998	0.382779
0.903987	1.08993	1.52575		1.197	1.77895	1.36277		0.891859	1.0924	1.6435		0.790865	0.789742	0.775575
0.599751	0.518762	0.541783		1.56509	1.64878	1.71658		0.780528	0.885173	0.98484		0.730907	1.27491	0.690139
0.755835	1.08156	1.80664		0.92672	1.1592	1.2132		0.462867	0.804193	0.98072		1.30368	1.32092	1.12346
1.2571	1.46922	1.45832		1.07413	0.972885	1.31081		3.04205	1.60147	1.86076		0.641827	1.13238	0.660028
1.42825	1.42235	1.21501		2.0872	2.11306	2.80302		1.0255	0.69616	1.03444		1.23175	1.86296	1.54412
0.818402	0.977647	0.888264		1.44841	2.39396	3.31205		0.841987	0.513391	0.900599		1.44363	1.85093	1.27309
0.956353	0.93043	1.38827		1.83211	1.43228	2.11739		1.08269	1.47766	1.74212		0.824054	0.683827	0.805839
1.13054	0.896897	0.541019		1.32315	2.13437	1.41747		0.971392	1.2932	1.2836		1.19232	1.02655	0.976226
1.03374	1.23976	0.837145		2.01319	1.33449	1.77265		1.23535	1.50898	1.43073		0.915404	1.12482	1.1032
1.19049	0.979517	1.28934		1.11862	1.80208	2.09939		1.06402	1.42259	1.2202		0.874829	1.16168	0.630191
0.378085	0.674803	0.632435		0.514749	0.443621	0.416109		0.644776	0.912769	1.25077		1.21033	1.53495	1.16433
0.85174	0.79602	1.16637		1.35618	0.339454	0.442797		0.421992	0.566866	0.642872		0.856575	0.813103	0.61415
0.691461	0.440366	1.40207		1.15361	1.74119	0.862899		0.922796	0.735944	0.955998		1.82522	1.51541	1.22586
0.679638	0.59525	1.06601		1.93051	1.40184	0.862853		0.844456	1.05185	0.806541		1.03069	0.983778	0.926547
0.603346	0.447457	0.978028		1.7504	0.950753	0.941149		1.21542	1.05242	0.691197		0.975104	1.23527	1.3493
0.830569	0.61749	1.42862		1.29901	0.774553	1.66236		0.50897	0.590194	0.979747		0.969899	0.503743	0.720986
0.813971	0.75521	1.13036		1.59681	1.41184	2.12717		1.05791	0.806991	0.671521		1.06022	1.12261	1.05606
0.654086	1.22849	0.735931		1.56345	1.25855	1.38548		0.613124	1.04014	1.23776		1.1933	1.08526	0.884971
1.23202	1.65849	1.00395		0.773928	0.713636	0.963083		0.921601	0.898575	1.09499		1.38852	1.99323	3.13914
0.662813	0.547732	0.56693		0.71637	0.812106	0.993567		1.56557	1.73821	1.99134		1.786	2.42519	0.733182
1.0103	0.985955	0.841582		1.46518	1.27227	1.0883		1.36722	0.949372	1.39789		1.35379	1.35899	0.476298
1.18671	0.763902	0.963671		0.4738	0.452767	0.657847		0.782769	0.637837	0.713385		1.11254	0.9039	1.174
1.1198	0.799435	0.922866		0.601816	0.528523	0.660957		0.583546	0.692882	0.751703		1.57859	1.35465	1.13466
2.21481	1.08648	0.956841		0.206723	0.367524	0.918199		1.20878	1.06178	0.846784		1.3394	1.28928	1.35831
1.17698	1.20453	1.10001		1.06442	0.733649	0.832314		0.951841	0.821487	0.910927		0.797245	0.707459	0.985166
1.43404	2.03085	2.05606		1.10155	0.883095	1.08476		0.640776	0.643768	0.284164		0.283385	0.550152	1.26203
1.1558	0.958703	1.03336		1.8986	1.8625	1.8385		0.999813	0.500019	0.828183		1.48486	1.44327	2.29415
0.575446	0.58312	0.688452		1.34544	1.33215	1.28922		0.675551	1.29052	0.911804		1.19727	1.02186	1.32235
0.65466	0.748983	0.69603		1.20413	1.42399	1.66052		2.39601	2.76699	2.13423		1.19567	0.89174	1.37505
0.574292	0.938957	0.380165		1.33885	0.750253	0.738133		2.33036	1.48012	1.17627		1.44539	1.09536	1.68002
0.674728	0.836766	0.858814		0.931852	0.971716	1.63143		1.04826	1.22686	1.4571		1.22903	0.694435	0.707506
1.19841	1.36336	1.79735		0.789547	1.02087	1.36899		1.23607	1.07835	1.2427		0.958712	0.430579	0.46554
1.21087	1.25916	1.41735		0.646901	0.687163	0.953348		2.46291	1.55261	1.14489		0.330867	0.388167	0.615969
0.98327	0.88284	0.578262		1.88064	1.43863	1.6436		3.07987	0.884396	1.78405		0.95318	0.504012	0.275532
1.37632	0.948791	0.860214		1.21516	1.14493	1.07413		0.73429	0.423291	0.856492		1.39486	0.59382	0.78756
2.03662	1.31033	0.984599		0.929693	0.989082	0.971001		1.39471	1.00337	1.60982		1.20353	0.917318	1.15821
0.609944	0.67007	0.555016		1.19999	0.760281	1.2999		0.571967	0.556768	1.64741		1.70145	2.08432	2.03908
0.986169	1.57668	1.30415		0.998001	1.54995	1.0667		1.03058	0.320759	0.379243		1.33231	1.09489	0.46744
1.32947	1.15376	1.27394		0.613554	0.363209	0.731581		1.22734	1.09793	0.559473		1.58121	0.843629	0.613087
0.450429	0.653085	0.470005		0.738757	0.75685	0.597699		1.06682	1.0347	1.713		1.26699	0.758482	1.03395
0.511957	0.620202	0.803942		1.55435	1.95188	1.41146		0.724755	0.372972	0.552752		0.720848	1.00964	0.700858
0.664617	1.2966	1.35227		0.747419	0.521221	0.788594		1.15489	1.60422	1.37545		0.571433	1.40023	0.911668
0.814637	0.762486	0.578381		1.31556	0.763064	1.18359		0.622066	0.597577	0.941255		1.22629	1.01447	0.847835
0.774769	1.11429	0.554217		0.831167	0.976463	0.739564		5.30873	3.97079	1.94548		0.429652	0.597443	0.926829
0.846916	0.969875	0.44224		0.813644	0.85452	0.262016		1.08085	0.880208	0.899011		1.54664	1.18267	1.20816
0.656652	0.88218	0.747091		1.09999	1.11715	0.557724		1.31512	1.04288	1.16965		0.826849	1.0387	1.28945
0.980058	1.01371	0.890387		0.849408	1.09775	1.0779		1.41994	2.0044	1.89247		0.996547	1.01365	1.33884
1.1259	0.963045	0.804199		1.43468	0.286013	1.18617		0.969337	1.06539	1.30326		1.50436	1.30185	1.47294
0.827069	0.359706	0.369947		0.962841	3.56679	2.53376		1.54826	2.04427	1.46196		1.29832	1.47463	1.55298
1.18847	0.520412	0.793086		0.604972	0.634555	0.64011		0.644558	0.643406	0.435503		0.745122	0.838815	1.14434
0.733413	0.531908	0.604169		1.04487	1.30254	0.942563		1.01215	1.19862	0.869059		1.35115	1.33008	1.54032
0.521914	0.649629	0.600896		0.651787	0.551569	0.442428		0.70785	0.569983	1.08607		1.09508	0.858205	0.96162
1.68862	1.4432	1.06108		1.04653	0.788204	1.07731		0.923443	0.841733	1.35996		1.18107	1.03257	1.58053
0.950463	0.966824	1.11594		0.795321	0.673768	0.677246		0.731441	0.741772	0.471278		1.62884	1.35117	1.30405
0.711273	1.11571	1.06845		1.18769	1.14088	1.0744		0.980202	0.640563	1.0472		1.91051	1.8369	1.48651
0.370046	1.20775	0.717925		0.75514	1.23342	1.70303		0.687192	0.613823	1.13753		0.704346	0.958885	0.819601
0.66585	0.636609	0.828102		1.17548	1.97031	1.36764		0.813215	0.812502	0.776829		2.0567	1.9459	2.22419
1.21186	0.95155	1.02274		0.688251	2.20908	1.47363		1.81866	1.52104	1.10743		1.1312	1.08098	1.12742
1.72547	1.18271	1.0749		0.489213	0.443981	0.28017		1.4461	0.876054	1.61427		1.11716	1.52891	1.09032
0.967089	0.802708	0.896493		0.451194	0.308656	0.493398		0.730901	0.694556	0.793205		1.97656	1.06497	1.52151
1.08721	0.693099	0.713826		0.675997	0.530312	0.404092		0.766777	0.759201	1.05851		0.675453	0.73948	0.938343
1.51283	1.04265	0.94314		0.731785	0.818036	0.595852		1.25529	0.537207	1.84232		0.863494	0.75176	0.967456
1.17911	1.80592	0.781143		0.66058	0.550741	0.377443		1.16215	1.04348	1.52909		0.65461	0.766086	0.764105
1.45847	0.936255	0.803115		0.536179	0.813777	0.779511		0.940543	0.773229	1.26379		1.00206	1.00557	0.987859
0.588596	1.14162	1.4973		1.14504	1.76407	0.925682		0.651792	0.758003	1.01757		1.22864	1.11135	1.03033
1.5244	1.13216	1.3934		1.2414	1.68141	1.00195		0.493169	0.788633	0.948066		1.26448	1.24437	0.893454
0.472682	0.636599	0.735852		1.81875	1.43125	1.55596		0.844642	1.23092	0.911158		0.861004	0.795973	0.64026
2.26395	1.78857	2.56505		1.22072	0.947192	1.26374		0.748039	0.837726	0.94711		1.17959	1.22077	1.49322
1.88186	0.992939	2.84437		1.79244	1.68365	0.947219		3.04656	3.26038	3.24066		1.28031	1.46717	1.49219
0.554002	0.682149	0.65934		0.717078	0.790123	0.999835		0.810542	1.17205	0.706156		0.826152	0.811158	0.56569
1.14321	0.902551	0.865738		0.908055	0.547828	0.491604		0.92335	0.56512	0.708122		1.22896	1.21555	1.61048
1.00155	0.784985	1.35121		0.976852	1.18704	1.10485		0.729751	1.19391	0.661726		0.708127	0.513739	0.829465
1.14168	0.652377	1.20932		2.21225	2.72304	3.70837		1.26958	0.775593	1.06877		0.53291	0.540092	0.394377
0.712008	0.606065	1.47674		0.658601	0.646204	0.942019		1.4092	0.78959	0.974665		0.881059	0.727103	0.651842
1.61067	0.935434	1.50666		0.578253	0.657847	0.522197		0.881345	1.17719	1.24429		0.812198	0.861645	0.920918
1.18093	0.608701	1.24971		0.946747	1.23064	0.92976		1.10838	0.51916	1.17692		0.462598	0.62235	0.318096
0.795851	0.509014	0.682876		1.87057	1.33865	0.996584		1.60817	1.62657	1.05583		1.48843	1.13442	0.688708
0.960068	0.463283	1.06484		0.720348	1.23731	1.25074		0.442288	0.55446	0.300516		1.23214	1.24764	1.79313
1.40952	0.44014	0.577781		0.592549	0.456762	0.62005		0.979759	0.48739	1.02549		0.972679	1.83847	2.34346
0.562279	0.724446	0.542187		0.918148	1.05637	0.818525		0.838608	1.00771	1.14253		0.995638	1.1904	1.43614
0.897488	0.753792	0.637557		0.862166	1.10765	2.20507		0.803155	0.757649	0.698703		0.962365	1.51329	0.85509
0.848889	1.0173	2.13313		0.618376	0.672022	0.606677		0.639149	0.326028	1.37833		0.784961	0.769916	0.776706
0.426918	0.48017	0.573081		0.738376	0.788445	0.645587		0.980323	1.06029	1.02597		3.18308	1.10935	3.21347
0.67496	0.601183	0.817653		0.211379	0.612952	0.463694		1.05841	1.91254	0.764447		1.05754	1.09551	1.24861
1.00898	1.28144	1.19443		0.978878	2.20253	0.952665		1.04483	1.13611	0.714695		1.37563	2.98084	1.88755
1.17263	1.83905	1.52746		1.1154	2.15581	1.26305		1.66566	0.940756	1.06308		0.824381	0.954471	1.58178
0.7657	0.819669	0.782174		0.894732	0.769448	0.489891		0.648895	0.833918	0.777088		0.971371	0.926334	0.937562
0.634059	1.05324	0.775319		0.893541	0.870314	0.383411		0.59089	0.430195	0.677254		1.39692	1.00538	0.874191
0.69107	0.82766	0.948662		0.746542	0.54684	0.629969		2.19662	0.978158	1.46994		0.99143	0.500286	0.287751
0.738355	0.761206	1.01275		1.30332	1.06268	0.546441		1.27547	0.572719	1.4833		1.0691	1.15381	0.72275
1.2499	1.01226	1.35039		0.815224	0.564658	0.674531		1.52918	1.18238	1.54874		1.92569	2.27864	1.70631
0.795227	0.466764	0.552148		0.751013	0.728669	0.865552		1.44774	1.59177	2.10115		1.14937	1.77323	1.49171
0.755058	1.30295	0.962536		1.56471	1.31988	0.969378		0.957421	0.933163	0.974106		0.945134	1.05471	0.638597
1.20717	0.94755	0.658527		0.971311	1.05894	0.857941		1.17997	0.6542	1.63776		0.693138	0.83665	0.482339
0.812787	0.469548	0.824328		0.438537	0.653769	0.620558		1.07153	0.850564	0.974345		1.35805	1.32196	0.670971
1.14158	0.784981	0.653386		0.690969	0.855672	0.878309		0.726537	0.52138	0.790345		0.282457	0.686312	0.299144
1.74968	0.196402	1.12606		1.03554	0.942689	1.10997		0.678344	0.59728	1.40016		0.327049	0.344744	0.234925
1.68398	1.16696	0.992291		0.706633	0.731738	0.578642		1.04638	0.636784	1.02886		0.839596	0.869462	0.638864
1.24538	1.16469	1.50474		0.87442	0.923045	1.02107		0.942635	0.455574	1.14954		1.75993	0.872724	1.80976
1.09675	0.643813	0.839758		0.629943	0.67659	0.618726		0.754865	0.464831	1.11414		1.71328	2.15866	2.14858
1.58613	1.43503	1.32594		0.622665	0.372826	0.620085		1.19525	0.572008	2.31855		0.853448	1.64202	1.09044
1.52112	1.30191	1.35434		0.641808	0.898233	0.702642		1.11889	0.699756	0.763845		1.29129	1.67538	1.52997
1.36987	0.536031	0.649593		1.43106	1.40103	0.918849		0.985328	0.99621	0.697943		1.17349	0.863451	0.896043
0.40596	0.925442	1.54439		0.631623	1.30646	0.53572		0.909136	1.86315	0.870218		1.01937	0.681704	0.918633
0.928984	1.21453	1.35353		1.17722	1.10857	1.06132		0.718091	0.864249	0.761137		0.692493	0.818204	0.983507
0.769235	0.923832	1.04145		1.88725	2.00949	2.17402		0.791086	0.745575	0.591954		0.794055	0.656511	0.600739
0.919198	0.912676	0.813895		1.57444	1.18896	1.154		0.888921	1.27952	1.2383		0.742893	1.19388	1.15759
0.840052	0.894333	0.569441		1.82067	2.80979	0.949053		0.526682	1.06676	0.699415		1.0294	1.0826	1.14808
0.406695	1.15546	1.01173		0.742638	1.05754	0.774338		0.795311	0.803743	0.961002		0.922322	1.01731	0.922854
1.26669	0.979006	1.43044		0.695519	0.841317	0.508657		0.92749	0.718729	1.35414		1.31839	0.746459	0.886123
1.02806	1.11679	1.14627		1.59883	1.57189	1.70497		0.821902	0.66971	1.18865		1.645	1.55007	1.49558
1.13035	0.962999	0.90005		1.14114	0.940779	1.5466		0.838726	0.67226	1.00052		1.28568	1.37405	1.71955
1.09962	0.715564	1.05986		0.880872	0.814289	0.69465		2.92219	1.63921	2.34359		0.629521	0.594148	0.759199
1.16373	1.21032	1.18399		0.78078	1.31383	0.842519		0.84659	0.815961	0.906457		0.716485	0.592898	0.594243
1.27404	1.10264	1.04816		0.974868	1.3997	1.30739		0.601189	0.659948	0.527881		0.866891	1.60015	1.50934
1.18735	1.14631	0.801415		1.21648	1.28221	0.882248		0.984606	0.837728	1.06058		1.31749	1.5447	2.25823
1.47217	1.1005	0.929715		0.661681	0.705309	0.81612		1.07643	1.127	0.98474		1.10828	2.40894	1.94365
0.182135	0.951576	1.30295		1.01828	1.14057	0.780663		1.03508	1.13541	1.11568		2.80904	3.30993	2.4131
1.22145	1.00963	1.26791		0.835887	0.817698	0.352551		1.08018	1.30127	1.01064		0.74347	1.61321	1.23748
1.11121	0.731021	1.14378		0.906376	0.853897	0.656311		0.976746	0.758008	1.07491		1.13564	2.02122	1.34616
1.04246	0.689492	1.35532		2.43446	3.90953	8.3403		1.13047	0.925025	1.01477		0.90363	0.636924	0.739396
1.72673	1.8881	2.03918		0.665205	0.924387	0.552506		1.30522	1.26343	2.28684		1.20423	0.876545	0.830022
1.14405	0.785745	0.722027		1.1283	1.67015	1.00483		1.26992	1.40257	1.83391		1.8006	1.35641	1.38196
1.08972	0.638431	1.49801		0.505346	0.830234	0.963273		1.34708	1.22587	0.99975		0.741824	0.982909	0.778863
0.604035	0.897431	1.06493		0.477585	0.522573	0.670752		1.04197	1.77087	1.66843		1.4586	1.78681	2.10336
0.768183	0.840609	0.704918		0.656862	1.30383	0.987478		0.673182	0.532736	0.945808		1.81931	1.51774	1.7827
0.306983	0.462076	0.530256		1.2345	0.932254	1.42932		0.985408	1.03919	1.32856		1.15336	0.768686	1.26474
0.760409	0.972716	0.96261		0.822952	0.736375	0.834607		0.584781	0.835203	0.721523		0.873514	0.61956	0.735813
0.673421	0.969977	0.603368		0.634295	0.772806	0.748734		1.34585	1.68977	3.034		0.877864	1.88491	3.1177
1.64599	1.60599	1.04366		0.396291	0.985729	0.851969		0.694395	0.677974	1.01356		1.91954	5.22052	5.23363
0.648205	0.55324	0.716198		1.02301	0.806711	0.717739		0.787544	0.979799	0.836324		0.624036	0.575169	0.54205
1.42161	1.29164	0.649214		1.08223	0.709209	1.02728		0.510044	0.982448	0.731639		0.751268	0.980828	1.50877
0.695475	0.564234	0.421446		3.07482	1.97308	2.80152		0.682463	0.581626	0.784571		0.600962	0.672054	0.98589
0.725395	1.04495	0.8774		1.06345	1.10069	0.712101		1.82116	1.4363	1.52988		1.80183	1.06522	1.52104
0.936103	0.720785	1.09116		1.24088	1.03758	1.07303		1.58476	1.20247	0.890272		0.417662	0.552749	0.380622
1.38746	1.61792	1.89819		0.971527	0.84911	0.966895		0.998874	0.942359	0.855495		0.762183	0.840207	0.839408
1.34891	1.69658	0.89619		0.971035	0.96039	0.784361		0.812127	0.722571	0.793728		0.635725	0.527293	0.531733
0.632909	0.791559	0.909575		1.2174	1.43518	1.67959		0.693674	0.642494	0.747953		2.11583	1.83438	1.82981
1.04379	0.805673	0.663418		1.31099	1.19711	1.4059		0.738295	0.90006	0.778303		2.02143	2.61542	1.87191
1.33028	0.838072	1.03699		1.41283	1.25526	2.51713		1.05206	0.889835	1.09994		1.4298	2.33641	1.57965
1.58819	0.661206	0.832439		1.31333	1.29255	1.41554		0.266593	0.928372	1.87519		2.21379	1.38498	0.87031
1.69389	1.71668	2.0011		0.668753	0.234833	0.419132		1.06594	1.2194	1.12585		0.959293	1.11645	1.13199
1.05238	0.89414	1.08269		1.0739	0.692868	0.876008		0.760512	1.36413	1.05184		0.788219	1.20811	1.21656
0.868915	0.831857	1.17706		0.918672	0.622737	0.564398		0.467214	0.410522	0.438933		1.49659	0.827137	1.83478
0.53845	0.61033	1.38948		1.00212	0.618995	1.23548		0.994696	1.19804	1.96356		0.508217	1.0085	1.6627
1.06814	0.786983	0.753669		0.972755	1.09699	1.15089		1.08743	1.33333	2.06463		1.50083	1.28663	1.94318
1.43002	1.23351	0.973449		1.11271	0.965383	0.981063		0.55361	0.650975	0.711673		2.33835	1.80416	1.81671
0.393842	0.591812	0.54829		0.792656	0.681024	1.75102		0.735808	1.00136	1.84581		2.83319	1.71388	1.5722
1.48383	1.37661	1.45718		0.948362	1.45337	1.45198		0.927534	0.466843	0.354937		0.933659	0.901219	0.904027
0.909757	0.807501	0.775916		1.16173	1.13772	0.851421		1.17384	0.798256	0.601838		0.873697	0.746203	0.651976
1.50295	1.75363	1.06033		0.829406	0.953272	0.97504		0.564563	0.575543	0.497817		0.434865	0.761147	0.783539
2.0405	2.2565	2.64369		1.73323	1.78148	2.43737		0.655161	0.438002	0.482879		0.93391	0.815563	1.08334
0.799125	0.993095	1.10485		1.61692	0.961209	0.670066		0.908956	0.408991	0.837724		1.0646	0.752776	1.4434
1.53871	0.67902	1.02668		0.803354	0.848925	0.839331		0.444122	0.315163	0.254282		0.866681	1.08204	0.664461
1.50216	1.50215	1.27997		0.909702	0.763379	1.78318		0.381553	0.361662	0.430072		0.722957	0.786859	0.699579
1.27111	1.84024	1.06798		1.44544	1.84593	1.71672		0.541094	0.503797	0.277973		1.26112	2.26582	2.51906
0.947985	0.606908	0.542321		1.52267	0.933606	0.423275		0.819166	0.421204	0.284714		1.73834	1.48881	2.64525
0.736465	1.05509	1.17763		1.01585	1.16348	1.50702		1.28028	1.21709	1.66648		0.738608	1.12675	1.1732
0.9839	0.524616	1.08003		1.82305	1.03308	1.43106		0.565152	0.717355	1.2903		0.148948	0.503758	1.22311
0.67864	0.573288	0.573854		1.04855	1.08392	0.54062		0.904063	1.27465	1.2775		0.760637	0.86907	0.713267
0.854821	0.757667	0.806426		1.33938	1.16855	0.267646		0.393236	0.904819	1.07376		0.864626	1.09544	0.754549
0.596504	0.906049	0.562048		1.40691	1.70128	1.14694		0.757279	0.974375	0.772306		1.25554	0.923776	0.87093
1.20353	0.411621	0.629644		0.846909	0.635256	1.08115		1.02266	0.69105	0.580518		1.44453	0.729889	1.6293
1.04089	0.910177	1.02787		0.736653	0.829861	0.811692		0.58276	0.75438	0.291556		1.74414	0.961437	0.668652
0.934592	0.486015	0.858534		0.892378	0.670853	0.436171		0.865253	0.874669	0.844942		1.02742	0.769775	0.965968
0.210115	0.777989	0.847477		1.30786	0.565481	0.726215		0.818614	1.22843	0.796987		1.43013	0.541078	1.00263
1.44329	2.05701	1.59001		0.779647	1.25106	0.710084		1.07981	1.13522	0.734688		1.00667	1.26481	1.17489
1.35668	1.25304	1.10394		1.0589	0.840439	0.898028		0.554781	0.582547	0.681563		0.86308	1.1322	0.763499
0.469778	0.351225	0.411672		1.0443	1.02772	0.831929		0.940113	1.1638	1.2248		0.635582	1.62803	1.05056
0.841019	1.0818	0.83339		0.525523	0.566172	0.879667		1.0784	0.62633	0.864091		0.916714	0.680167	0.766617
0.818793	0.27845	0.883092		1.43245	1.45307	1.76002		0.702997	0.839548	1.21979		0.749407	0.551059	0.579308
0.753536	0.403497	0.973245		1.51864	1.44508	2.30977		0.735195	0.979512	0.738147		1.23907	0.87865	1.46628
0.391031	0.536266	0.83375		1.62988	1.22324	1.1024		0.627422	0.646269	1.08012		1.00734	0.896936	0.815374
1.74633	1.16954	2.1655		0.974733	0.522103	0.281314		0.878792	0.830041	0.893268		0.852344	1.17645	1.00696
1.85703	2.60097	2.12702		0.481031	0.166337	0.865718		0.796611	0.660602	0.563941		0.985068	0.776551	1.36546
1.56224	1.85352	2.18888		2.75151	2.707	0.978909		0.813989	1.06634	1.15078		0.818455	0.606128	1.61175
1.11599	1.11282	1.01945		1.12613	1.00601	0.930339		1.37543	0.927047	1.05942		1.59904	1.65519	2.30697
1.38038	1.20649	0.498962		0.745838	1.01451	0.536821		1.11114	0.62316	0.950206		0.947425	0.819198	0.731646
1.92352	1.53726	2.3319		1.5612	0.417129	1.61921		1.01899	1.08239	0.948404		1.0352	0.891153	0.922712
1.31867	1.32609	0.753542		1.15231	1.54717	0.86882		1.01859	2.00196	0.745315		1.00185	0.749588	0.361755
1.05891	0.865877	0.674123		0.850648	1.47735	0.914191		1.536	1.83738	2.83018		0.667544	0.708721	0.717457
1.50107	1.22768	1.26491		0.726725	0.861258	0.908023		1.01553	1.12837	1.23113		1.33288	1.64014	1.1019
0.917314	0.69616	0.914846		1.00455	0.594097	0.849279		0.894402	0.486288	0.861187		1.30535	1.46024	1.20646
1.60992	1.10326	1.09067		0.905229	1.68178	0.580398		1.24261	1.05872	0.987452		0.966385	1.0222	0.461142
1.98363	1.9655	2.35683		0.87806	1.3123	0.2825		0.888546	0.676549	0.725535		0.916999	0.935589	0.872098
0.936152	1.78515	1.59594		1.96648	1.17427	1.83607		1.20812	0.745711	1.01118		0.845363	0.955159	0.899902
1.63947	1.16475	2.38442		0.824712	0.627735	1.00136		0.727691	0.598161	0.964595		0.819123	0.672219	0.844386
3.7963	3.05892	3.95616		1.10281	1.6512	1.31412		1.62146	1.09697	1.03924		0.570322	0.718741	0.600143
1.30082	0.658942	3.95823		0.772879	0.766912	2.51323		0.984541	0.626522	1.04974		0.634325	0.858954	0.391025
0.952797	0.743936	1.16312		1.07864	0.678853	1.02538		0.522934	0.613447	0.758104		0.580739	0.755816	0.399632
1.00825	0.834339	0.967112		0.942569	0.976327	1.21979		1.07495	0.563355	1.0077		1.2027	0.563343	0.914095
1.16695	0.96794	0.841415		0.814916	0.765731	1.0827		0.670095	0.607722	0.775848		0.965246	0.929651	0.689836
1.30459	1.80835	2.63181		1.44948	2.59803	3.27383		0.80164	0.582004	1.00568		0.650687	0.827788	0.796663
0.646459	0.871672	1.78513		2.28945	1.58207	1.99061		0.690994	0.755875	0.931378		0.6076	1.19248	0.682279
0.76681	1.10681	1.09949		2.06466	1.48614	3.79725		1.03642	0.167242	1.0302		0.721631	0.696696	0.943898
1.16813	0.949716	1.09779		0.983729	0.503	0.890077		1.11404	0.774287	1.10671		1.04155	1.35032	1.22756
0.969954	1.31988	0.684079		1.28081	0.842117	1.0956		1.03763	1.27224	1.81598		0.483257	0.597355	0.602366
0.764155	0.593863	0.582786		0.573019	0.521208	0.296619		0.918706	0.525116	1.19709		0.906005	0.77554	0.653386
0.989854	0.651727	0.716997		1.16315	0.795195	0.513468		0.776957	0.44306	0.743466		0.95132	1.16719	0.891975
1.23244	1.1866	0.722489		1.12628	0.994126	0.578494		0.546998	0.739102	1.01924		0.393957	0.623929	0.664886
1.96428	2.19034	1.83503		0.758541	0.512582	0.748268		1.15111	1.31595	0.986029		0.388777	0.939964	1.40351
1.14818	1.21163	2.10514		1.82058	1.8279	1.57763		0.842138	0.900717	0.765727		0.860364	0.852438	0.792874
0.789965	0.788874	1.03136		1.55681	1.64504	1.57034		1.09999	0.962296	1.66872		1.82123	1.39563	1.11028
1.18723	1.81602	2.79159		1.91632	2.50285	1.97292		0.900826	1.15272	0.892783		1.10347	0.775501	0.542849
1.70763	1.84678	1.52075		3.57247	2.43853	2.64431		1.28099	1.1029	1.46469		1.87154	1.98937	1.61153
1.69146	1.21676	1.26069		3.21338	2.52524	2.77786		0.963797	0.864631	1.22351		0.836956	0.543469	0.398217
1.02161	1.48088	1.12533		2.3096	3.6962	3.51173		1.14563	0.967243	1.78749		0.67603	0.970968	0.651834
1.30036	1.36074	1.62978		1.46481	1.39327	1.6461		0.944209	1.17427	0.958867		1.59042	0.909746	0.657695
1.41943	1.22305	1.79045		1.37183	1.22068	1.5896		1.45619	1.21295	1.33657		1.44991	1.1879	0.862802
2.8634	1.52356	1.2803		2.69809	3.61946	1.02312		1.2655	1.11458	1.59536		1.03871	0.884373	0.678662
1.11221	1.16906	1.38538		0.721063	0.892137	0.66551		1.47353	1.24135	1.42169		1.28974	2.72273	2.33434
1.12397	1.04482	0.987824		1.09993	1.48213	1.65007		1.00028	1.07693	1.14192		1.06203	1.0296	0.818828
1.48512	1.20799	0.437725		2.18682	1.47925	2.13156		1.62839	0.799351	0.614773		1.01413	0.760046	1.04605
0.91442	1.44744	1.31881		1.18724	1.40423	1.16492		1.09422	1.24639	1.21394		0.776661	0.943078	1.90938
2.76603	1.7418	2.38554		1.14596	1.0649	1.27468		0.49727	0.867059	1.2189		1.24841	2.34123	2.59374
1.05432	1.05823	0.991843		1.57922	1.15922	1.3109		1.81411	1.77692	1.54249		0.755587	0.372979	0.401111
1.16505	0.65536	0.740439		0.909229	1.24552	1.19423		1.1847	1.18025	0.905714		1.34347	1.60579	1.4845
1.51944	1.36985	0.977577		0.99204	0.589645	0.628496		1.22775	1.00807	0.601241		2.36078	1.93813	1.96152
1.18348	0.732067	0.770657		1.78059	1.32908	1.28152		1.58665	1.19393	0.515798		2.07042	2.89884	2.32324
1.36088	1.33129	1.88426		1.26291	0.91771	0.9367		2.4482	1.48324	0.584734		1.16656	1.24825	1.0938
1.48878	1.15781	1.58463		1.22586	1.72656	1.17013		2.10123	1.05179	0.524023		0.909755	1.92931	0.59225
1.19258	1.47619	1.47728		1.85113	2.76175	2.20133		1.46778	2.4804	1.54594		0.930024	0.965931	0.665061
1.23163	0.996433	1.25328		1.62722	3.52744	1.90941		1.46025	1.14286	0.471179		0.742981	0.508764	0.228353
0.65168	0.924727	1.19072		2.11128	2.62351	1.99028		0.843289	1.43081	0.933374		1.2674	1.15199	1.15998
1.06776	2.05422	3.56207		1.01078	0.972879	0.837437		1.34226	1.17549	1.13841		2.20909	3.61179	2.33851
0.699678	0.31781	0.875381		0.852688	1.33153	0.95442		0.777294	0.916209	0.73759		1.73128	1.87437	1.84127
0.950914	1.26389	1.09271		1.14746	1.71632	1.18661		0.671632	1.15995	0.87793		1.96316	2.10548	1.16182
1.3424	0.944229	1.42921		1.37544	2.09053	1.15083		0.973628	1.32303	1.43098		1.88896	1.59674	1.32281
0.814877	0.814805	0.938174		1.4617	1.40423	0.929175		0.87269	0.707974	0.733024		1.12231	2.2234	1.47054
1.26574	1.8114	1.88016		1.31933	2.35249	2.20754		0.772076	1.03279	1.1304		1.13476	1.44408	1.05749
1.0476	0.909734	1.13693		0.666124	1.28457	0.894567		1.04127	1.32708	1.03595		1.94658	1.78279	2.14623
0.61608	0.255716	0.821668		0.742881	1.42703	0.853916		1.11719	0.683241	0.615905		1.24854	1.26601	1.15523
1.33642	1.18066	1.22768		0.890115	0.889967	1.03354		0.963602	0.924153	0.792787		0.867195	0.90483	0.681391
0.752009	1.17438	0.526515		1.05413	0.611578	0.351102		0.789696	1.46659	0.967849		0.836369	0.87219	0.824919
0.968085	1.069	1.06251		1.31137	0.563926	0.858075		1.17902	0.644221	0.867966		0.62764	0.984273	0.860281
1.22927	1.37028	2.14601		1.07446	1.2345	0.884713		1.62845	0.95318	0.926181		0.876582	0.78011	1.58204
1.12404	0.683935	1.19488		1.0711	1.49003	1.19929		1.02742	1.08686	1.0033		0.743797	1.28856	1.50272
0.942962	1.42736	1.39789		0.701445	0.689102	0.489313		0.905279	1.60275	0.976095		0.804926	1.10389	0.766561
1.26526	1.57186	1.35665		2.14092	1.87475	2.44929		1.68942	1.5161	1.14398		1.58355	1.34303	1.09641
1.12617	0.915063	1.25256		1.28406	0.936774	1.33145		1.11897	1.55076	1.38434		1.00284	0.993196	0.815494
0.810317	1.03794	1.08738		1.5576	0.970447	1.67052		1.25605	0.926725	1.11185		1.32499	1.65719	1.06519
1.48577	1.69199	1.22251		1.36724	1.03844	1.02577		1.15054	1.17312	1.6114		0.963887	1.47737	0.86991
1.62208	2.47583	2.76088		1.75346	0.662701	1.67496		0.811061	0.970557	1.01226		0.783871	1.21456	0.924677
0.849926	1.01536	0.738253		0.793062	0.634685	0.547035		2.00256	2.08029	1.5926		1.0403	1.22127	0.893723
1.14215	1.06629	1.39258		1.0976	1.11941	1.22333		0.96751	0.511538	0.617101		0.369402	0.886428	0.886012
1.61547	1.46839	1.61002		0.461891	0.65469	0.446454		1.46315	1.34947	1.05614		0.853265	0.809092	0.86194
1.24073	1.50089	1.29319		0.432132	0.400617	0.374248		1.47973	1.43589	1.19915		1.59117	1.64563	2.50872
1.19331	1.29298	0.998389		0.768234	0.398383	0.683598		0.695278	0.986492	0.718603		1.66373	1.98472	2.50334
1.23702	1.70249	1.4177		1.24555	0.90177	1.30249		0.526603	0.912588	0.498242		0.476113	0.551256	0.903339
0.678654	0.479819	0.464048		0.789068	1.66746	2.14884		1.93736	0.991003	0.918217		0.730365	0.699899	1.54565
0.446629	0.835166	0.829827		0.560419	1.40615	0.992141		0.726243	0.585434	0.672306		1.20472	0.807445	2.3049
1.1092	1.46574	1.34505		0.510385	0.774209	0.846351		0.82243	0.479019	0.524726		0.846672	0.947514	1.01172
1.40605	1.93337	1.94649		0.953899	1.165	0.944055		0.719066	0.566308	0.615176		0.869254	0.822701	0.30799
0.586869	0.960484	1.53731		0.833418	1.11089	1.10584		1.72462	2.14948	2.28443		5.56538	8.81461	5.58693
1.03622	1.82314	1.57374		0.775381	1.48501	1.83153		0.787167	0.744011	0.64836		0.675244	1.06447	1.08343
0.726571	0.958044	0.974862		0.883389	2.00786	1.1134		0.817182	0.988809	0.797421		0.698312	0.458238	0.493638
1.13089	1.59539	1.66501		0.748809	0.668111	0.673858		0.439407	0.773281	0.781607		1.32959	0.747909	0.953513
3.08629	2.44126	1.68071		0.906909	0.465574	1.19549		1.35024	1.09784	0.886247		1.28483	0.922093	1.16568
0.864566	0.674524	0.467255		0.786814	0.935654	1.47445		1.47787	1.40672	1.05837		0.583979	1.16051	1.17783
1.26681	1.02133	1.16908		1.34195	2.67615	1.0061		0.989078	0.932261	0.839684		0.867774	1.02293	0.64697
1.09562	0.849092	0.326147		0.776373	0.716164	0.604197		1.01247	1.37217	1.05638		1.31921	1.55973	1.57877
1.03337	1.10059	1.20009		0.539919	0.611866	0.541857		2.50677	2.4246	2.05205		0.41911	0.489564	0.768985
1.31086	1.32288	1.06927		0.570974	0.615457	0.688316		1.26495	1.24023	1.09988		1.05734	0.684186	1.09338
1.16085	0.988545	0.99455		0.56642	0.556929	0.81153		1.4876	1.51587	0.681825		1.33001	0.957385	2.2393
0.707232	0.869126	0.502713		0.552646	0.375349	0.434878		0.821128	0.641813	0.440597		1.37765	0.868537	1.92589
0.646272	0.497988	0.291347		1.19011	1.15524	0.781898		1.02688	2.17112	1.37357		0.897737	0.797859	1.7616
1.59657	0.974549	0.969199		0.613588	0.629479	0.773287		1.37389	1.159	1.22663		1.40244	0.701119	1.61062
1.31963	1.15677	1.04078		0.753484	0.452715	0.464358		2.09136	2.36051	2.8167		0.870503	0.853197	1.27791
0.997972	0.670239	0.880259		0.789338	0.98717	1.26659		0.23053	0.543914	0.565848		0.972636	0.829282	0.84979
0.78232	0.884433	0.705464		1.03188	1.49547	3.24804		1.22112	1.31795	0.792535		0.895566	1.12778	0.999216
0.362668	0.475193	0.939716		0.542981	0.950168	1.27425		0.923686	0.946852	0.385941		1.58127	1.38872	1.85894
0.6776	0.628069	0.802809		0.860251	0.859586	0.612315		1.4784	1.48869	1.02114		0.747897	0.626034	0.95399
1.44826	1.2234	1.39804		1.43231	1.24689	1.66155		1.2326	1.71685	0.868107		0.838971	0.693969	0.578781
1.14758	0.699345	0.686615		1.05252	0.73208	1.0027		0.96691	0.697109	0.665894		0.439307	0.237444	0.719109
2.01961	1.18556	1.28698		1.481	1.92053	2.75592		0.806442	0.809715	0.980439		1.20361	1.37774	0.696809
1.08898	0.600669	0.603957		0.831616	0.994365	0.761262		0.231958	0.329099	0.781		0.947007	1.09935	0.677688
0.712342	0.614497	0.52283		0.655342	1.19897	1.04397		0.972221	0.640018	0.883899		1.00947	0.742678	0.78543
5.38141	4.1821	2.76915		0.670879	0.777098	0.792642		0.981295	0.875876	1.16798		0.657883	0.548594	0.432849
0.988358	0.775472	0.541706		0.580118	1.28028	0.468397		0.650096	0.900036	0.676609		0.881472	0.52268	0.840706
1.11832	0.917883	1.06715		1.46074	1.79762	1.59203		1.06051	0.824031	0.835888		0.660253	0.399839	0.624162
1.46352	1.6334	1.06989		0.917742	0.7161	0.590291		1.25559	0.781127	0.988242		0.520503	0.738119	0.709615
2.13679	1.07955	1.30206		0.817124	0.56954	0.472086		1.24593	0.855092	1.0574		2.266	1.40012	1.78892
1.75545	1.67879	1.35457		0.855319	0.563907	0.852586		1.10047	0.553203	0.769598		1.66215	1.45267	0.895778
1.29434	1.049	0.789009		4.65296	5.68674	5.07505		0.806183	0.962146	1.05683		0.854502	0.680671	0.732699
1.66663	1.66332	1.6828		1.45186	1.15643	0.92535		0.988331	0.623065	0.96194		0.715571	0.968118	0.537696
1.03232	0.737144	0.775889		0.541383	0.611486	0.589883		0.811826	0.650755	1.0038		1.05887	1.63459	2.36246
1.27079	0.983703	1.51317		0.921361	1.45436	1.47053		1.86226	1.62856	2.11447		0.576579	0.746926	0.863149
1.40428	1.64442	1.72684		0.78889	0.537491	0.90813		0.560008	0.996674	1.05004		0.5281	0.355957	0.583575
1.04308	1.29699	1.3662		0.643623	0.512294	0.887153		1.27722	1.15854	1.14994		0.775689	0.72654	0.67782
1.09515	1.04145	1.60487		0.651045	0.524544	0.794488		1.73334	2.96604	0.68005		0.448881	0.62316	0.442169
1.5272	1.68942	2.20812		0.708928	0.545606	0.313801		0.865374	0.596256	0.863585		0.869729	1.18957	1.38057
1.65726	2.19587	1.33732		0.750238	0.765819	0.886481		0.838157	0.725547	0.497076		0.702346	1.00755	0.779227
1.0503	1.01992	0.467207		1.37153	2.92458	3.98743		0.741395	0.844912	1.11799		1.30144	1.11743	1.09168
1.45902	1.29914	0.994727		1.29541	2.15585	1.99576		1.48108	0.678033	0.930358		0.694883	0.76743	0.523443
0.377256	0.545131	0.349818		1.49323	1.59122	1.39926		0.498787	0.588199	0.361513		1.314	1.14807	0.57518
0.907111	2.31038	1.54378		1.53672	0.935647	1.58938		0.560363	0.755806	0.782373		1.00616	1.15429	0.775093
1.31622	1.68399	0.955411		2.572	1.80574	2.56727		1.10009	1.11633	1.0457		1.20729	0.629668	1.01675
1.3166	1.47901	1.24988		0.840051	0.462117	0.442798		0.716272	0.749091	0.519839		1.79391	1.74396	1.81625
1.06786	3.31958	1.15925		0.973909	0.828094	1.00973		1.46862	0.704989	0.984878		0.965386	0.723185	0.873788
0.971957	2.2274	2.12584		1.36839	2.11324	1.72285		1.68418	1.20438	1.21233		0.668953	0.587606	1.53247
1.35824	1.53766	2.39696		1.05501	1.29144	1.11792		0.863971	1.1943	1.46898		0.543639	0.511077	0.830108
1.8928	1.93284	1.5737		1.02814	1.67459	1.17953		1.17956	1.27855	1.58886		1.18007	0.716839	1.01933
0.920749	1.40541	0.79416		1.30256	0.393039	0.362468		0.988496	2.44473	0.946193		1.49395	0.890623	0.260877
1.534	0.686874	0.485208		1.20566	0.727496	0.97038		1.43844	1.35307	1.57812		1.17824	1.34116	1.38707
4.66679	2.48176	4.88596		1.40853	1.18228	0.917818		0.957412	1.0962	0.995735		1.0122	0.82449	0.774975
0.65402	1.02963	0.752217		0.563424	0.525184	0.528181		1.02188	1.13639	0.925061		1.47987	1.54671	1.14989
1.24473	1.42764	1.37451		0.866109	0.638046	1.05023		1.35797	0.856055	0.835644		1.59618	1.06246	0.922765
1.7038	1.58934	1.20714		1.80805	0.831484	1.31655		1.02352	0.974363	0.637825		0.875063	0.723274	0.600437
1.16936	1.25284	0.686048		0.441634	1.31302	2.21901		0.766119	1.0572	0.630217		1.65646	1.47523	0.980258
0.821231	1.01072	0.789487		0.980858	1.0983	0.846521		0.699139	0.935055	1.67324		0.783862	0.729477	0.719154
1.3674	1.07602	0.969005		1.00735	0.95198	0.795587		1.11282	1.07349	1.63903		0.85545	1.00514	0.94899
1.02677	0.902928	0.427252		1.81298	1.11598	0.749764		0.863391	0.898024	0.835197		1.87819	1.37946	1.02681
0.786247	0.962582	0.575947		0.865514	1.00164	1.05767		1.35786	1.07817	1.27531		0.904171	1.1183	0.997142
1.08905	0.583257	1.19196		0.671385	0.533563	0.844976		0.870994	0.544663	0.703851		0.726794	0.532492	0.556902
1.24944	0.734344	1.01338		0.477828	0.342901	0.583095		0.67819	0.488824	1.1381		1.63706	0.979581	0.899525
1.21246	0.954924	1.04346		1.1263	1.62684	1.80499		0.441222	2.12864	0.829782		1.36708	0.557178	0.605661
1.08477	0.860105	0.653907		0.927557	0.717193	0.742829		1.29189	0.708093	0.590231		2.5944	0.892511	1.04863
1.10001	0.726845	1.22911		0.861888	0.542929	0.62581		0.910246	0.93919	1.16066		0.652545	0.578707	0.788949
0.972356	1.33135	0.744541		2.91703	2.29139	2.67708		1.21096	1.13237	1.32781		1.3509	0.819452	0.745165
0.85135	0.354003	0.112078		0.556608	0.842325	1.50137		0.77446	0.896549	1.0302		0.469281	0.646697	0.795847
0.952755	0.797804	0.626694		0.804823	1.65732	1.13997		1.13199	1.87145	1.50165		0.473452	0.350374	0.490809
1.32868	2.46112	3.05643		0.667336	1.11327	0.570748		1.01182	1.51572	1.43321		0.404477	0.357506	0.590765
1.03926	1.81862	1.06507		2.46562	2.0915	2.26612		1.58723	1.23473	1.64295		0.674704	0.729999	0.433371
1.18928	1.23446	0.976163		0.961433	2.86309	2.54977		1.3352	2.0863	2.10451		0.551768	0.601384	0.810258
0.825643	0.567143	0.612115		0.687264	0.406866	0.404761		1.23201	1.27709	1.36576		0.379045	0.301055	0.725963
1.4751	0.800674	0.66478		0.807836	0.70825	1.38431		0.900798	0.591075	0.969151		0.387794	0.449209	0.669851
1.31252	0.853332	1.49727		0.637263	0.575495	0.363518		0.914513	1.09353	1.17749		0.542357	0.818567	0.765432
1.09903	0.806316	1.67727		2.08873	3.22551	3.19403		1.17917	1.04138	0.753103		1.22811	1.19271	1.63029
1.65349	1.54766	2.27585		2.91747	3.12918	4.28109		0.902535	1.24277	0.496216		0.968398	0.838576	0.962743
1.29479	0.525578	0.212314		2.0263	2.28972	3.10099		1.14916	1.2547	0.829165		0.564816	1.35334	0.837912
1.38806	0.971825	1.52552		1.98619	1.84869	1.03383		0.771425	0.400629	1.11648		0.720477	0.926808	0.939807
0.827333	1.03793	1.31643		1.16807	0.927421	1.31524		0.83641	0.897832	1.23689		0.841989	0.745133	0.769444
1.34894	1.16587	1.32974		0.654134	0.581332	0.673713		1.16783	0.365649	0.854236		1.20509	1.33476	1.69698
0.926878	0.786127	1.3315		1.80531	1.3611	1.33364		0.526807	0.932314	0.699192		1.20007	1.17087	1.52324
0.930619	0.76615	1.30583		0.830634	1.10619	0.854379		0.839778	1.23215	0.762099		1.52366	0.77194	1.83312
0.99543	1.11772	1.5389		0.931312	0.633701	0.330835		0.865089	1.02509	1.11566		0.838255	0.611534	0.927023
0.789003	0.829981	0.994287		0.765847	0.487328	0.508219		0.559166	0.989375	0.771088		1.68934	1.8848	1.5503
0.791237	1.21795	1.12592		0.921632	1.26988	0.945963		1.29598	1.00417	1.32803		1.63402	1.28439	0.993751
1.53255	1.2545	2.11966		0.732418	1.33735	1.10182		1.50248	1.08717	1.18295		1.42078	1.44351	1.25982
0.928978	0.695257	1.08619		0.599307	0.869654	1.2477		1.62772	1.22297	1.36646		1.06631	0.908399	1.15216
0.503725	1.98295	1.41228		0.960409	1.08557	0.968048		0.886056	0.994689	0.512112		0.892359	0.705544	0.902799
0.985699	1.91826	2.80306		0.818859	1.07149	0.919819		1.19331	0.721512	0.637687		0.690619	0.723524	0.507762
0.863291	2.45247	1.65917		1.14065	1.20734	1.98593		0.457692	0.895935	1.05014		1.20581	0.874068	0.611005
1.27075	2.27735	0.79267		0.950558	0.636459	0.339367		0.979676	0.687556	0.674216		0.657205	0.833581	0.924285
0.969084	1.91896	2.26513		1.15227	0.635698	1.48598		0.908341	1.2237	1.15651		0.671981	0.90911	0.814173
1.06664	2.40311	1.44922		2.02987	2.19901	2.35072		0.558806	0.479269	0.600032		1.88144	1.15806	2.09123
0.766008	0.930333	0.573622		1.70671	2.53946	2.98252		0.486131	0.568375	0.671473		0.941268	0.950196	1.25929
0.823323	0.664983	1.41153		0.804351	0.695988	0.877097		0.763306	0.912226	0.897432		0.61924	0.601594	0.630381
1.10134	0.593745	0.578358		1.0541	0.772735	1.31968		1.38094	1.67325	1.08707		0.852721	0.71796	1.18965
1.03528	0.762926	0.932034		3.4717	2.22133	2.21262		1.13851	1.91353	1.41549		0.678407	0.837102	0.85516
0.928947	0.81126	0.721052		1.04664	0.839896	1.11488		0.900423	1.13572	1.19044		1.11787	1.16903	1.47685
1.1747	1.29473	1.08216		2.56214	1.83577	2.1446		0.936341	1.1782	0.717863		0.375669	0.617274	0.882602
4.3795	3.73704	5.83881		1.31615	0.609494	1.49411		1.03018	1.50073	0.853221		1.41102	1.04005	2.11936
0.772773	1.07222	0.987955		0.690183	0.920097	1.04635		1.00582	1.33027	1.58801		0.785329	1.07625	1.14259
0.528938	1.06815	0.362639		2.75612	2.76341	3.46757		0.625566	0.846732	0.467515		0.89561	1.23631	1.18663
1.07484	1.95598	1.49766		0.93577	0.782952	0.790259		1.14897	1.27864	0.749226		1.10087	0.97796	1.54176
1.30116	0.843271	1.0959		0.904752	1.17889	0.976234		0.597471	0.799645	0.857042		0.783304	0.777566	1.02422
0.719624	0.540501	1.3161		3.13843	2.40938	1.50624		0.64683	0.803971	0.262805		0.782126	0.934949	1.32589
1.25033	1.59798	2.51312		0.662515	1.13148	1.23498		0.671789	0.830303	1.30011		1.07703	0.917994	1.24853
0.873855	1.22517	1.7325		0.803444	1.05436	1.12165		1.09848	0.735114	0.711136		0.9721	1.26708	1.40852
1.33141	1.57296	2.26109		0.74372	1.05881	0.850974		0.717296	0.859841	1.04423		0.502042	0.741074	0.70383
0.949194	1.00473	1.29212		0.628316	0.251949	0.782477		0.846599	0.811446	1.29067		0.66399	1.32289	0.916127
1.41933	1.8305	1.37629		0.805447	0.936954	1.00498		0.641798	1.02207	1.3008		1.1124	1.40037	1.21534
0.209381	0.440204	0.785888		0.508064	0.518909	0.560697		1.41233	1.34214	1.76208		0.624503	0.943502	0.678006
1.34543	2.32975	2.69627		1.05957	1.14816	1.07392		0.802808	1.13631	0.714394		1.08223	0.710339	0.574699
0.844637	0.873103	0.669306		0.757255	1.41398	1.23184		0.457959	0.948933	0.325862		1.33037	1.47465	0.861519
1.13915	0.903513	0.775013		0.895542	1.36533	1.80966		0.20729	1.29291	0.144765		0.740122	0.751079	1.43955
0.927873	1.13579	1.49135		0.801962	0.658097	0.872297		0.843519	0.729491	0.474578		1.08358	0.711769	1.22426
0.560765	1.30487	2.11443		0.321657	0.858277	1.02143		0.532515	0.61693	0.339665		0.992797	1.07417	0.840566
0.799921	1.35808	2.26716		0.827129	1.37222	2.04168		0.690773	0.74942	0.725014		0.885399	0.748229	1.02736
0.42469	0.83959	0.882486		1.04055	7.6747	6.59547		1.01979	0.384557	0.783645		0.652956	1.09633	1.08478
0.917625	0.825425	1.13281		0.708529	1.43106	1.55351		1.01652	0.866525	0.442564		1.26437	0.745322	0.881279
0.693237	0.540845	0.586609		1.07163	1.51292	1.70466		0.63759	0.582372	0.813418		1.10765	0.801697	1.14365
1.08551	0.829453	0.919132		0.252434	0.914975	0.688321		1.1492	1.22927	1.23011		1.28809	1.31437	1.53265
0.575052	0.904471	1.54119		0.92319	0.678149	3.19725		0.984803	1.01669	0.940403		0.972502	1.22217	1.23596
1.38203	1.18877	1.44828		1.07644	1.11881	0.887139		0.860088	1.14603	1.01388		1.16465	1.13457	1.8537
1.25154	1.59749	1.22794		0.925251	1.16379	0.825321		1.29018	1.98584	1.70364		0.638242	0.731925	0.935027
0.554099	1.02992	2.1421		1.04362	1.93187	1.27623		0.975735	1.18523	0.576888		0.613317	0.427211	0.48951
0.652427	0.577308	1.20853		1.11222	0.82535	0.986675		1.47177	1.68335	0.863328		1.23794	1.39976	0.468223
1.30571	0.7174	1.02776		1.0424	1.0159	0.856708		1.12726	1.55712	0.593026		0.484905	0.80079	0.375469
1.9343	1.77502	2.11497		1.49628	1.60417	1.77849		1.28703	1.67986	1.01643		0.868304	0.948148	1.68645
1.21031	1.70644	1.9776		0.867877	0.904214	1.69525		0.60669	0.995201	0.674915		0.734728	0.943305	0.935246
0.726259	0.7033	1.11096		0.990858	1.16159	0.782836		0.526275	0.739964	0.554642		1.24199	0.829596	1.14404
1.00327	1.32277	1.88776		0.665712	0.840011	0.739286		0.855081	1.10565	1.07814		1.21508	0.881481	1.29937
1.18209	1.72717	2.34547		0.639911	0.670972	0.644574		0.581443	1.16729	1.83515		0.581757	0.462894	0.745075
1.97589	2.21374	3.14809		0.648673	0.792139	0.855053		0.561261	0.841196	0.964765		0.718199	1.3654	1.60575
1.52363	1.48433	2.18579		0.556779	0.744759	0.715508		1.05958	0.757702	1.02533		1.56297	1.84434	2.72826
1.38552	1.99555	2.19488		1.01145	1.00857	1.01143		0.985508	0.750106	0.593268		1.12399	0.86584	0.695075
2.11091	0.767702	1.32018		0.752298	0.74205	1.92008		0.708288	1.10253	1.12694		0.91762	0.469048	0.836486
1.85394	2.21603	2.35775		0.718333	0.716104	0.656518		1.25058	1.37681	1.34298		1.15668	0.59785	1.23294
0.987156	1.23371	1.33254		0.279245	0.608423	1.06395		1.04023	1.06715	0.782039		1.29363	0.640634	1.14842
1.48246	2.00743	1.69604		0.625254	0.591676	0.861439		1.11965	1.26692	0.995437		1.12298	0.847165	1.04246
0.609483	1.70728	1.17752		0.546406	0.867065	1.01754		0.695639	1.03349	1.04427		1.08754	0.748167	1.00202
1.0881	2.34491	1.40807		0.876196	0.765552	0.973848		1.14594	1.15326	1.09147		0.992193	0.780386	0.922391
1.42931	1.50466	1.95096		0.732156	0.903213	0.877432		0.722268	0.848719	0.445851		2.1706	1.67578	2.04164
1.13858	1.16285	1.63586		0.380788	0.366988	0.780319		1.5387	5.83552	8.04435		1.24442	1.12896	1.27626
1.0048	0.725776	1.01426		0.636392	0.755767	1.04976		1.72791	1.33113	1.26168		1.29419	0.885698	1.50411
1.04903	1.18842	1.63423		0.822876	1.22501	1.75101		0.927767	0.774014	0.790197		1.8081	1.1982	2.91994
1.10579	1.18286	1.35112		0.852672	0.942213	1.82274		0.756518	0.589157	0.222212		2.61171	1.81844	2.76158
1.0058	0.849829	1.19321		0.332655	0.578815	1.05859		0.913389	0.689198	1.28608		1.23684	1.20568	0.665888
0.802015	1.43266	1.37499		1.25962	1.21367	1.46005		1.79573	1.74185	1.64126		1.12508	0.85661	1.27258
0.983268	1.41754	1.3782		0.697066	0.389278	0.91796		1.36244	2.57128	1.07755		0.905623	1.02884	0.932607
0.946018	1.29309	1.40656		0.690761	0.911824	0.589212		1.04523	0.921729	1.8148		1.09242	1.0484	1.08664
7.60394	6.90418	8.2486		1.13781	1.39683	1.25482		1.25542	1.32511	0.365347		0.909764	1.14379	0.859209
0.934727	1.02227	1.07393		1.06073	1.09417	1.08514		1.22565	0.886042	1.33211		1.00527	1.05614	0.949723
0.756039	1.82813	0.824962		0.513554	0.9074	0.733954		0.98926	0.653968	0.935836		1.08122	1.49877	1.7672
1.21605	2.25402	1.76075		0.750112	0.622698	0.9976		4.7592	6.07213	8.49761		1.38236	0.995863	1.23525
1.73721	1.16872	1.39035		2.0139	0.960373	1.47487		1.70271	0.688982	0.829301		1.13847	0.462655	0.47186
1.3527	1.25898	1.2373		2.25081	2.05984	2.90613		1.94639	1.04787	1.12169		1.4689	1.33936	1.4347
0.666854	1.3387	0.583385		0.719935	0.402192	0.798608		1.94827	2.29682	1.61845		1.18329	2.04654	2.25257
1.17971	1.22432	0.544473		0.476675	0.89425	0.800119		0.857352	0.717143	1.03194		1.25751	1.06436	0.608803
1.05682	1.78614	1.38039		0.874959	0.827687	0.802915		0.875984	0.696161	0.680661		1.3148	1.60786	1.76101
1.55494	1.82502	2.90452		2.41362	3.25972	3.76943		1.95933	2.12991	3.45256		3.08323	2.90098	2.96751
1.69002	2.75211	2.86262		1.19956	1.67057	3.09558		0.650816	1.14831	0.762122		1.89787	1.66096	1.27488
1.68392	2.63694	2.65675		0.659227	0.811953	0.787805		0.624185	0.708245	0.566675		1.36756	0.708825	2.25868
0.603022	2.68699	2.45454		1.74411	1.85453	3.39978		0.823596	0.814349	0.306637		0.504886	0.321172	0.399938
1.56891	2.42392	2.45394		1.08612	0.668627	1.63083		0.641008	0.72284	0.424318		2.08578	1.90374	2.0901
1.32186	0.702659	0.9901		0.521316	0.665192	0.756492		0.907289	1.23381	1.02041		0.628499	0.556556	0.32772
1.18595	1.53423	2.8801		2.50568	2.15586	2.71879		0.96027	1.07566	0.925608		1.34522	1.30242	0.740066
0.872047	1.66873	2.08531		0.972103	0.762955	0.731797		0.826967	1.1422	0.779645		1.27188	0.978349	0.6939
1.56985	1.39578	1.12145		1.00741	0.917537	1.75418		0.702869	1.03943	0.752144		0.836429	0.634341	0.638213
0.966843	0.886842	1.02622		0.875789	1.30704	1.1211		1.16638	1.07901	1.54368		1.37286	1.18916	1.21665
0.850366	0.606272	0.578732		1.12657	1.50588	1.95214		0.869121	1.98325	1.09168		0.959848	1.07046	0.826518
0.460379	0.608901	0.438173		1.10233	1.04565	1.06129		1.07022	0.851611	1.49944		1.74915	1.52718	2.04037
0.937317	0.788859	1.03327		0.772391	0.934147	0.908935		1.09101	0.638191	0.655968		0.933943	0.915455	0.869051
1.47442	1.30867	1.67285		1.33657	1.02525	0.855556		1.58137	0.782491	0.978745		1.30587	1.3193	1.48583
0.790659	1.0418	1.05951		0.662764	0.569415	0.484106		0.794055	0.761177	1.10602		1.06774	1.19859	0.895543
1.26658	0.968273	0.988534		1.75539	1.33944	1.52921		0.963447	1.06492	0.565972		0.542568	0.455506	0.476703
0.708383	1.02033	0.785156		1.53558	1.16255	1.63014		0.751057	0.342637	0.426842		0.891496	1.10213	0.978867
0.58728	0.505602	0.693331		1.80213	1.49501	1.20517		0.625756	0.857285	0.894964		0.989623	1.18667	0.741182
0.735206	0.524776	0.454725		0.658916	0.59938	0.767295		0.586402	0.792126	0.841402		1.05278	0.867011	1.01762
2.36652	1.18075	1.5945		0.554067	1.07643	1.07947		0.913951	0.877571	1.51281		0.832398	0.502264	0.594087
1.16417	0.878983	0.414023		1.13374	2.5549	1.48532		1.02983	0.929792	0.975956		0.709455	0.322704	0.266391
0.999053	0.823462	0.788449		0.939403	0.369464	0.386688		1.0355	2.08092	0.781511		1.09981	0.825951	0.759502
0.988152	0.969172	1.19306		1.00621	1.24462	1.28899		1.43219	1.79816	2.24219		0.989573	0.807121	0.840535
2.1784	3.21149	1.35566		0.934686	0.93011	1.5777		0.715344	0.873611	0.646216		1.32277	0.910051	0.977453
1.57017	1.60074	1.6979		0.788658	0.92529	1.22741		0.801534	0.704133	1.2735		0.768435	1.01503	0.922273
1.2588	0.788578	0.611905		0.864142	1.26746	1.77391		1.59742	1.97354	1.11739		0.941352	0.827932	0.762172
0.480985	0.29717	0.240461		0.730769	0.873426	0.638104		0.774723	0.762746	0.89543		0.818091	0.896551	1.47635
0.196425	0.360257	0.248477		1.15114	0.89913	1.40738		0.130917	0.284269	0.283854		0.834934	0.40317	0.348457
0.819662	0.648657	0.474724		0.699522	1.02197	0.995434		1.41558	1.15787	1.47035		0.960567	0.67102	2.02044
4.57524	4.9966	3.88343		0.639206	0.860005	0.809996		1.84705	1.55589	1.14119		0.456011	0.571192	0.296085
1.54462	1.64444	1.55702		0.617959	0.67273	1.26598		1.46686	0.426622	0.715539		0.981178	0.966156	0.448843
0.828054	0.982176	1.51317		0.731843	0.81259	0.95813		0.858836	1.34028	1.04313		2.40537	1.02987	1.96255
0.891211	0.964433	1.17376		0.781255	1.08676	0.965306		0.944253	1.37433	1.29473		1.09853	0.832945	0.664323
1.59228	1.75721	1.95931		1.08233	1.29765	0.983071		0.778528	1.19497	2.08855		0.682098	0.901607	0.638161
1.50119	1.76148	1.897		1.13814	1.59219	1.25446		1.18347	0.9493	0.853272		1.60777	1.26805	1.67255
1.20288	1.13476	1.47656		1.09011	1.32195	1.32588		1.49344	1.21098	1.97146		2.21024	1.50852	1.93491
1.40866	1.60291	1.57504		0.833469	1.04877	0.674183		1.5186	1.16336	2.27288		1.10781	1.25183	1.00563
1.35869	1.19265	0.983128		1.00565	1.30662	1.1821		0.669198	0.312811	0.482898		1.44491	0.713602	1.56277
1.6765	1.28825	1.07805		1.46252	2.28009	2.11998		1.13506	0.682867	0.671217		1.29337	0.841823	1.20104
0.786437	1.16664	0.524749		1.05551	1.24797	1.06148		1.28157	1.0617	2.20191		1.86921	0.736757	0.903731
1.24453	1.31189	1.21849		1.08683	1.68073	1.32108		1.31213	1.10728	1.87881		1.36206	0.612766	1.32538
2.57661	1.96404	2.49631		0.731181	1.39278	1.10915		1.5076	1.22055	2.40179		1.16492	0.913849	0.773941
1.17892	0.530551	0.897388		1.08913	0.99592	1.57477		1.16151	0.951809	0.433877		1.76128	5.0838	2.92239
1.29464	0.722481	1.74681		0.839726	0.704727	0.786363		1.18394	0.760813	0.92248		0.930487	0.908739	0.912518
0.677632	0.838694	0.921205		1.39933	1.30362	0.791822		0.837466	0.788454	1.78377		0.94245	0.992688	0.691196
0.627086	0.832337	0.745029		2.18682	2.68903	0.949639		0.766291	0.435491	1.3641		0.682066	0.521861	0.309062
0.858097	1.04286	1.21221		0.698241	0.515702	1.13727		1.76729	2.08363	1.38303		1.36774	1.2236	1.12215
0.593625	0.771536	0.792071		1.32251	1.44297	1.64106		0.375727	0.788377	0.830099		1.27138	1.06678	1.25526
0.473186	0.805215	0.772232		1.11233	1.58946	1.95713		0.669263	1.14791	1.51832		4.22336	3.11352	4.07847
0.92701	1.25654	1.14253		0.957268	0.651401	1.31492		0.677515	1.12381	1.14794		1.36376	0.975455	0.963189
1.19273	1.39276	1.45887		1.10441	0.889221	0.92505		0.679529	1.91231	0.926789		0.857407	1.76098	1.46192
0.687048	0.730787	0.939199		1.33047	0.422662	0.6286		1.07002	1.16272	1.23323		1.07805	0.763253	0.779435
0.519505	0.630093	0.752964		0.732039	1.76008	2.33481		0.347462	0.209674	0.533062		1.19058	1.15982	1.07708
0.949322	1.32504	1.52135		0.692328	1.07798	0.63669		0.671384	0.626643	0.923613		2.20571	1.91859	1.19763
1.51008	2.30934	1.06007		1.08908	1.13963	0.951581		1.50713	0.844275	1.12278		2.04233	0.565001	0.993042
0.555222	0.821657	0.872416		1.44623	1.20563	0.677598		1.39295	0.173228	0.213556		0.842931	0.709133	0.563702
0.619807	1.02707	1.02506		0.74475	1.07717	0.419513		0.762216	0.658768	0.39		1.01609	1.01242	0.63449
1.34805	0.883849	0.795094		0.774088	0.954849	1.04932		0.510544	0.836636	1.85535		1.62883	1.73031	0.791182
0.767548	0.826052	0.700768		1.27675	1.42733	1.40427		1.2748	1.22815	1.93208		1.05241	0.612355	0.934955
0.834791	0.450182	0.435048		0.669674	0.909268	0.746391		1.04022	2.08758	1.59852		0.621405	0.680539	0.573716
0.953434	0.673429	0.593246		0.478566	0.699761	0.996929		0.630986	0.377381	0.902123		0.346122	0.734016	0.63201
0.644307	0.577082	0.380341		0.547784	0.520181	0.824968		1.03913	0.681077	0.845937		0.95408	1.16094	0.673093
1.06815	1.08276	0.636603		1.32831	1.39209	2.32674		2.03601	0.979289	1.71964		0.877501	1.00551	1.11061
1.33353	1.49739	0.927938		0.859148	0.853173	0.900895		0.926998	0.562536	1.84896		0.992815	0.964916	0.934185
0.867267	0.797134	0.452652		1.25718	0.752495	0.674419		1.63031	1.32877	1.45113		0.949854	0.601582	0.52943
0.595975	0.523853	0.385502		1.02409	1.24851	1.37728		0.354711	0.627496	0.476211		1.74619	1.04421	1.52478
0.746421	0.659338	0.354311		1.16347	1.18167	1.2729		0.337256	0.303112	0.220771		0.634373	1.15097	0.581583
0.695715	0.491534	0.442558		1.47823	1.74714	1.57736		0.438427	0.386884	0.496753		0.821043	0.914456	0.979477
1.25174	1.81062	2.23083		1.98398	2.40941	1.63434		0.783376	0.593515	0.542512		1.42249	1.29283	1.6347
1.09166	1.22906	1.4827		1.0553	1.11727	1.15101		0.591882	0.78178	0.712931		1.22695	1.17897	1.22019
1.21296	1.11169	1.10022		0.814908	0.644646	0.699097		1.12593	2.04072	1.04201		1.21018	0.980385	1.16089
0.940942	0.987687	1.07458		0.682394	0.602234	0.468309		1.01836	1.23994	1.25784		1.50851	1.27396	1.31964
1.23701	1.27122	0.941415		1.7813	1.49121	0.973502		1.2646	1.40742	0.961926		0.811894	0.761693	0.888343
2.36149	1.6511	2.53658		0.963187	0.442938	0.547285		1.06068	0.763527	1.31012		0.875223	0.785856	0.361819
1.80356	2.4233	1.84104		2.13754	1.80904	0.868398		0.550814	0.559658	0.158275		0.750656	0.551197	0.743495
1.11409	1.11796	1.13424		0.921463	1.20181	1.85934		0.609467	0.686729	1.16176		0.610652	0.615722	0.641444
0.877768	1.13438	1.2094		0.354933	0.491007	0.836797		0.554349	0.424434	1.09751		0.734753	0.691736	0.844792
1.39708	1.45977	1.10568		0.610261	0.521311	0.567104		1.13797	0.95347	1.28506		0.567854	0.546202	0.673323
1.09746	1.33987	1.51438		3.33942	2.05917	2.16091		1.4798	1.18647	0.719404		1.46816	1.08654	0.690815
1.21044	1.32855	1.46258		1.25866	1.97267	1.15412		1.55184	1.21872	1.06843		1.12882	1.23943	0.751929
1.26148	1.52204	1.21747		0.792019	0.50797	0.562766		0.670784	0.770947	0.49222		1.92517	0.870966	0.782448
1.37803	2.03423	2.17918		1.04739	0.88932	0.636722		1.70694	1.16269	1.595		2.14374	1.41017	2.0595
0.745808	0.608869	1.33893		1.17541	1.76518	0.241914		1.87939	1.63542	2.23662		2.85768	1.25332	1.52989
1.58827	1.50815	1.25934		1.07444	1.02952	1.35122		0.699621	0.943909	0.605345		1.53351	0.690326	1.18526
1.1069	0.815539	1.08828		1.25511	0.879492	1.25721		1.23963	0.868743	1.01954		0.48038	0.314938	1.12103
1.1995	0.970679	1.11733		0.885229	1.1166	1.03753		1.82704	2.41478	0.953855		1.47206	0.827074	1.37182
1.44371	0.609443	1.10154		1.25012	0.690463	1.0071		0.968315	0.402296	0.372955		0.720826	0.556913	0.423509
0.755184	0.569169	0.249771		1.63455	1.2219	1.21809		0.84774	0.568868	0.368074		0.713781	0.611809	0.464
0.845882	2.96267	1.76309		0.874329	1.2488	0.640556		1.96846	0.897182	1.70184		1.46752	0.767572	0.558016
0.821462	1.49345	1.52131		1.44715	1.26255	1.35243		0.906254	1.09123	0.701712		1.64915	0.838348	0.814183
1.06538	1.03594	0.815024		0.673347	0.850138	0.823113		1.00328	0.655272	0.592113		1.34462	0.713285	0.505458
1.28741	1.36378	1.84412		2.09204	1.66164	1.20915		1.20532	1.15312	1.0421		0.50763	0.856463	0.448819
0.969564	1.22803	0.89787		1.28378	1.4299	1.60827		1.08129	0.904287	0.876588		1.81317	0.730216	0.708168
1.50679	0.8229	0.716151		1.03858	0.981241	1.20224		1.10696	0.96956	1.583		1.47713	1.13174	1.49158
1.49549	1.21219	1.53693		1.0968	0.818651	0.918753		0.839591	1.10903	1.27276		1.81039	1.30954	1.35095
0.933494	1.04059	1.30988		1.02723	1.33859	1.13663		0.802375	0.276355	0.19934		1.38458	1.73026	1.91771
0.775827	1.04521	1.38118		0.602437	0.54207	0.471734		1.41178	1.14818	1.66551		2.27043	1.01033	1.00694
1.51413	1.31578	1.01083		0.493404	0.483756	0.737552		1.02892	1.04077	0.614125		0.503176	0.776193	0.783653
1.39205	1.59529	2.10679		2.33007	3.34389	2.38891		1.35991	1.08293	1.37864		0.305887	0.211988	0.430168
0.905531	0.810182	1.12865		0.721533	1.23619	0.791682		1.41906	1.31474	1.89445		1.01834	0.778295	0.421923
1.22808	1.1874	1.6414		1.61849	0.757608	1.32503		1.71705	0.85079	1.49438		1.81403	1.3587	1.58389
0.559873	0.769592	0.831411		1.1997	0.881536	1.30459		0.877766	1.99469	1.84209		1.9857	1.79633	1.81197
0.946661	0.70232	0.819379		1.00229	1.29379	1.01456		0.54412	0.911513	1.4632		1.56716	1.98424	1.79677
1.48472	0.854512	1.76952		1.01395	1.31513	0.609055		0.772461	0.551192	0.529946		1.9792	1.64146	1.52287
0.535754	0.339515	0.431462		0.888952	0.808997	0.718566		0.972674	0.701163	0.757524		1.33108	1.25261	1.69057
0.601771	0.616227	0.418971		0.934373	0.990522	1.2886		1.11798	1.78392	1.09491		1.3533	1.32607	1.93593
1.17073	0.922656	0.881145		1.24542	1.51894	1.23655		1.18866	1.3212	1.24652		0.616373	0.676502	0.683632
1.18818	0.80806	0.616071		0.980972	0.724317	0.995644		0.807431	1.06763	0.978959		1.19859	1.75311	1.11111
1.05285	1.1282	1.23647		1.00343	1.09031	0.855016		2.4655	3.38545	4.13899		0.443675	0.234052	0.280336
0.81403	0.706938	0.661036		2.68144	3.44572	2.48209		1.27404	1.01507	1.07251		0.962027	1.15411	1.14964
2.22821	0.879359	0.763252		0.863378	0.97235	0.951751		1.39824	0.779522	0.895178		0.517828	0.727002	0.300423
1.7021	2.41788	1.65533		1.0894	1.73933	1.64847		1.24001	1.26911	0.969704		0.873347	0.594532	0.960759
2.42066	1.93928	0.956822		0.908375	1.4021	1.2474		0.819382	1.1025	1.05603		0.938314	0.89778	1.32387
0.676022	1.17028	1.04851		0.630009	0.956689	0.685569		1.25499	1.84285	1.64773		1.04163	0.732991	0.954625
0.426453	1.08526	1.05426		1.13096	1.47995	1.52075		1.60417	1.7623	0.917247		0.576673	0.976385	1.2301
1.05008	0.840017	1.08585		1.18696	1.43632	1.7944		1.32308	1.44999	0.410765		1.09592	0.970537	0.780324
1.16798	0.666841	0.746442		1.35003	1.6637	1.75105		0.988751	1.08643	1.20893		0.966794	0.996811	1.31009
1.01311	0.530474	0.393		0.52475	1.49823	1.24537		1.06357	0.915341	0.596028		1.01154	1.41625	1.59686
0.897912	0.967656	0.919582		0.873543	1.7399	1.47375		0.678673	0.771989	0.530972		0.978017	0.953616	1.1053
0.989318	0.950341	0.826694		0.878448	1.32987	1.36929		0.719268	0.909538	0.543564		1.31606	1.40878	1.61928
0.993284	1.10983	1.62586		0.696378	1.31642	1.06854		0.909425	0.748572	0.770763		1.17632	1.3348	1.6703
1.81205	3.45151	4.83284		0.864853	0.450717	0.408898		1.33907	1.5437	2.17628		1.58692	1.49811	1.52605
1.41903	2.55208	3.09141		0.507124	0.823563	0.400442		1.40306	1.47687	1.06989		1.53887	1.70407	1.57131
0.773643	0.735353	0.989788		1.8544	0.662251	1.50445		0.954208	0.547898	0.463816		1.08731	1.05729	1.39304
0.893192	0.841013	1.3865		1.20604	1.49281	1.19256		1.75114	1.17173	0.539727		1.78183	0.950612	1.09404
0.802094	1.14744	1.31025		1.50683	1.89533	1.8679		0.510022	0.768601	0.66036		0.79435	1.20288	0.411105
0.981736	0.922519	1.72116		1.12848	1.47646	1.37275		2.30947	1.79355	1.30495		1.4324	1.75114	0.856571
1.20133	0.966282	1.17998		0.818429	0.79836	0.625184		1.18784	1.22394	0.991791		1.84812	2.11213	1.24026
1.0249	1.10772	1.08411		0.687521	1.21613	0.777951		1.15807	0.70057	1.20797		1.11422	5.13291	3.43069
1.6892	1.24107	1.2025		0.651562	0.594161	1.11943		0.551389	0.85583	0.295149		1.41325	1.88524	1.56706
1.10481	1.01339	0.999359		0.693429	0.552198	0.994345		0.717069	0.947866	0.810182		1.55705	2.21804	1.45608
0.575795	0.766106	1.06735		0.849521	1.02381	1.21466		1.07188	0.847322	0.582497		1.18886	1.77317	1.72589
0.337945	0.307656	0.619724		0.633678	0.717974	1.02097		1.18506	1.44	1.21007		1.26925	1.73252	1.3092
0.739273	0.578713	0.7972		0.590724	1.09503	0.951772		0.634483	1.045	1.25504		1.16723	1.31387	1.16965
0.677596	0.283643	0.577586		0.551721	0.768234	0.960127		0.969999	0.797328	0.493316		1.55049	0.589121	0.806263
0.774215	0.532649	0.72014		0.756702	1.14654	1.29798		0.657046	1.17347	0.655485		1.421	0.84112	1.60251
0.588505	0.224117	0.599156		0.788232	0.882692	1.42409		1.62444	0.994034	0.969237		0.610207	0.722949	0.799227
1.84942	2.35423	2.53684		0.746092	1.33416	1.68049		1.09238	1.30287	1.15701		1.26559	0.941325	1.43744
0.81401	0.446502	0.890993		1.42028	1.66217	1.77261		0.848465	1.05456	0.723067		0.923613	1.69044	1.9906
1.10067	0.643284	0.392231		0.700881	1.11929	1.01698		0.906264	1.85756	1.34314		1.01947	1.59202	1.29968
0.8837	0.56268	0.758196		1.55234	1.33537	2.51991		1.30575	1.1467	1.23619		1.21049	2.77655	2.94599
1.05758	0.915407	1.58596		1.00133	1.33457	1.36885		0.895634	1.4369	0.946426		1.15174	0.942222	0.866801
1.33203	1.15354	0.7272		0.745984	0.415816	0.724071		0.913846	1.34925	0.62408		2.50779	1.49261	1.41187
1.35269	0.678343	1.17866		1.44465	0.529881	0.562492		1.02599	0.969547	0.992208		1.49192	1.34658	1.3437
0.711397	0.471161	0.857305		2.73862	1.86123	2.02795		1.13233	1.54222	0.925465		0.877852	1.38517	1.38686
1.37171	1.205	1.30455		1.46799	1.21218	0.720284		1.15997	1.1385	1.13606		0.93992	0.526719	0.666667
1.04203	0.757445	0.990267		2.04808	1.81837	1.41782		1.16631	1.26721	1.46879		0.804452	0.952186	0.907648
0.961265	0.502621	1.40456		0.958709	1.11355	1.57977		1.40859	1.11547	1.06309		1.24227	1.1641	1.02457
0.920752	0.505583	1.9689		1.25953	1.55705	1.26964		1.02595	0.779222	0.50762		1.23288	1.97769	1.43483
1.07847	0.51586	2.74312		0.850223	0.7807	1.08408		0.434526	0.53487	1.31217		1.10748	1.09113	0.985522
1.35909	0.908879	3.0043		0.994979	0.92775	0.98465		0.495735	0.763343	0.917473		1.29641	1.43923	1.37363
1.27978	1.30025	1.22296		0.934777	0.936353	1.13134		0.852176	1.3185	1.20777		1.50291	1.40991	0.698702
0.885003	0.616527	0.838899		0.391655	1.44122	0.873879		0.527243	0.716459	0.648423		1.15487	1.11032	1.40217
0.819659	1.0519	1.0986		0.752469	0.811788	1.00672		0.860609	1.22632	1.69713		1.41078	1.13582	1.28496
0.376481	0.591006	0.645129		1.012	0.989326	1.05535		1.08505	0.876327	0.559436		0.731867	0.854386	0.84394
0.842054	1.18351	1.1628		1.41075	1.11436	1.25151		0.741619	1.27565	1.05605		1.16305	1.15191	1.28474
0.882062	0.983044	0.890527		0.895913	0.909882	0.9966		0.704661	0.750922	0.735933		0.778282	0.831042	0.770069
0.495302	0.739372	0.862908		0.85203	0.822856	0.820777		0.727765	0.653751	1.19064		1.05103	0.68052	1.20798
0.635548	0.96229	0.671363		0.976226	0.923835	1.27684		0.727263	0.60065	1.08873		0.591078	0.865668	0.66194
0.847047	0.674303	1.85329		0.559138	0.872235	1.23255		0.26576	0.811661	1.0918		0.292217	0.638921	1.01399
0.520693	0.580284	0.672524		0.866241	0.926595	1.19493		0.76707	0.342203	0.762404		0.928824	0.985761	0.634614
0.86984	1.13027	1.07682		0.831794	0.473935	1.01099		1.41422	0.860086	1.14255		0.805727	0.639924	0.538445
0.608182	1.00145	0.877168		0.799619	1.0349	1.40659		1.62189	2.43967	1.14356		1.54647	1.43924	1.08526
0.846985	1.23947	1.17495		1.12842	0.84743	1.1212		0.650229	0.999064	0.831309		1.49782	1.57642	1.25406
0.523174	0.708134	0.582676		1.19496	1.30365	1.25729		0.231914	0.607361	0.862469		1.03382	1.29896	0.968118
0.693694	0.800269	0.781115		0.424597	0.991651	0.610504		0.787842	0.943846	0.868073		1.76449	2.07878	1.82705
0.740139	1.09239	1.25403		1.34576	1.08671	0.807149		0.752683	0.99742	0.883455		0.773408	0.844364	0.659261
1.85918	0.729273	0.99139		1.42818	1.07002	1.09347		1.19417	1.30814	1.53752		1.23179	2.52769	2.06307
0.760886	1.31131	1.17003		1.14372	1.23139	1.63176		0.913191	1.21812	0.779739		0.796765	0.687711	0.910221
0.703161	0.785291	0.900334		0.607725	0.490209	0.803749		0.666738	2.07811	1.69018		0.897367	0.906537	0.948926
0.588248	0.468078	0.571417		0.772635	1.07796	1.23002		0.526029	0.977863	0.66483		1.29013	1.21146	1.1889
0.71723	0.698041	0.771118		0.694956	0.693048	1.19346		0.984613	0.906498	1.27355		1.22307	1.14255	0.865564
0.773629	0.465639	0.524177		0.622857	0.906486	0.991674		0.693562	0.557377	0.298627		1.47172	1.2713	0.973263
0.816845	0.790987	0.944801		1.22356	1.22355	3.17449		0.744267	1.14071	0.797069		1.20842	0.786106	0.779452
0.709431	0.924509	0.549249		0.682513	0.980077	1.13752		0.989907	0.861006	0.644397		0.859753	1.01943	1.90808
1.05605	0.498694	0.687502		0.946826	1.19757	0.727215		1.43695	1.22106	1.14349		0.644319	1.10223	0.796328
0.942866	0.895023	0.834706		0.757218	1.71654	0.593767		0.449034	0.46271	1.01076		0.624678	0.632873	0.760639
1.01403	0.677443	0.55949		0.56422	1.13562	0.642416		0.586704	0.996932	0.987304		1.18686	2.33827	1.20117
0.486057	0.73742	0.563703		0.24305	0.281589	0.728355		0.790228	0.673435	0.771218		0.637386	1.12259	0.858106
0.713615	0.854723	2.14617		1.12349	1.0551	1.68862		0.967433	1.37869	1.2566		0.355684	0.5024	0.296146
0.76992	2.03751	3.19949		1.07	0.694057	0.818702		1.16322	1.09003	1.36259		0.730802	0.513	0.606554
1.21706	2.38772	0.850566		0.532693	0.373356	0.568403		1.15912	1.4241	0.94125		1.3131	1.36192	1.17907
1.22564	1.70168	3.13148		1.42056	0.950931	0.276493		1.4833	1.32083	1.13143		0.65435	0.771872	0.68079
1.0289	2.36598	1.10399		1.10492	1.41531	1.02297		1.06578	1.13421	0.69007		0.74767	1.22716	0.337406
0.838972	2.50723	2.69282		0.708135	0.746729	0.712139		0.910145	1.14915	1.48823		1.81108	1.8118	1.67015
0.973455	2.15056	2.95192		0.772566	0.826138	1.1283		1.47967	1.16697	0.965086		0.733035	0.84442	0.907921
0.892843	1.44292	2.1479		1.07115	1.04838	1.33161		1.25093	1.43401	1.09289		0.990306	0.870013	0.902224
1.25981	2.84198	3.02228		1.03818	1.12824	1.36802		1.5431	1.40309	0.941991		1.05715	0.751542	0.919773
1.05225	2.92361	2.13443		0.947754	1.16066	1.47409		1.35446	1.55225	1.3256		1.05503	0.958149	1.44859
1.0064	2.03881	2.67233		1.11842	1.12313	1.31014		1.08706	0.795854	0.655774		1.98829	1.90076	2.4505
1.44243	2.50964	4.03168		1.01397	0.59299	0.996843		0.753625	1.53836	1.39163		1.28705	0.869153	1.36606
1.05436	1.86832	2.08936		0.86171	1.04284	1.34162		0.704543	1.29869	0.684142		0.611467	0.793716	0.677006
1.32628	0.885864	1.37443		1.17015	1.23384	0.95307		1.0261	0.989958	0.781135		0.761544	0.488252	0.61535
0.841686	1.04655	1.37273		0.933506	1.1504	0.915985		1.54725	1.53114	1.32124		0.821055	0.768051	0.806373
0.731571	1.09315	1.33904		0.910608	1.14704	1.28176		1.11814	1.19164	0.863557		0.870841	1.10652	0.763484
0.583076	1.08458	1.12094		1.08938	1.1975	1.83747		0.940037	1.23441	1.22374		0.800286	0.819718	0.80242
0.821727	1.01806	1.63859		1.06055	1.16639	1.67109		0.893286	1.73667	1.37101		1.38773	1.94782	1.17417
0.409116	0.5133	1.07844		0.665608	0.465111	0.495624		0.815756	1.03928	0.634961		0.901818	0.830873	0.767755
0.739537	1.09289	1.31413		1.1703	1.02002	1.74634		1.37198	1.33574	1.29056		0.478679	0.984122	0.430816
0.788421	1.61668	1.89479		0.824391	0.607401	1.25485		1.1398	1.19101	1.0242		1.4561	1.54136	1.12882
0.595115	0.769981	1.14321		0.918725	0.850227	1.00895		1.41792	1.2309	1.0177		0.772114	0.72417	0.716225
1.56022	1.78695	0.629427						0.761985	0.850279	1.06009		0.571084	0.656081	0.831989
0.66141	0.910434	0.559597						0.85168	1.02706	0.908338		1.31243	0.34632	0.855281
0.945228	0.648687	1.30067						1.53073	2.08224	0.362783		1.87017	1.99366	2.16843
1.35148	1.0937	1.55824						0.875906	1.09779	1.04689		0.763154	1.22219	1.27814
0.892758	0.774547	0.505378						0.965167	0.827795	1.11727		0.834375	0.862232	0.995437
1.24938	1.26816	1.85662						1.23129	1.02155	1.02851		0.796665	1.49645	1.5968
1.3167	0.707916	1.03552						1.15416	1.22799	1.13923		1.39703	1.85841	1.74405
1.33365	1.05937	1.14184						1.27024	0.815405	1.20275		0.572049	0.49525	0.869253
0.603967	0.401405	0.775253						0.5646	0.868302	0.829259		0.764147	1.02641	2.22819
0.78514	1.39237	1.13791						1.21411	1.07281	0.881463		1.08536	1.08938	1.48447
0.698667	1.63899	1.08835						0.846696	1.11376	0.745635		1.01828	0.96879	1.08152
0.869236	1.30107	1.34534						1.56065	1.80797	1.19179		1.00028	1.2368	0.603758
1.001	0.63188	0.444202						2.55887	1.41643	1.33786		0.980958	0.899663	0.609158
1.46126	1.94032	0.422853						1.05131	1.19152	0.9648		1.57991	1.18796	0.887542
1.08852	0.725453	0.568311						0.468816	0.510031	0.553		0.538076	0.507813	0.918588
1.85591	1.52108	1.7305						0.604866	0.954216	0.558394		0.764196	0.777687	1.17718
1.00787	0.989734	1.43892						0.79628	0.628098	0.780953		1.28642	1.18976	1.69508
1.03683	1.17189	1.25155						1.40596	1.436	1.43275		1.50127	1.85188	1.82896
1.13393	1.70795	1.53825						0.938462	0.607356	0.638266		0.640206	1.03777	1.02309
0.816813	1.25024	1.26515						0.54462	0.771567	0.619429		0.376513	1.30107	1.54513
0.851376	1.39352	1.53867						0.660987	0.385056	0.489291		1.30787	1.36814	1.3332
0.715103	0.994971	0.808129						0.56268	0.46772	0.539343		0.932265	0.943243	1.05015
1.31824	1.60933	1.2492						0.739846	0.694166	0.66836		1.10297	0.937808	1.12603
0.834532	0.574858	0.950713						0.424611	0.428445	1.31945		0.805872	1.29134	0.893358
1.25487	1.57457	1.27357						1.14154	0.502528	0.72116		0.864403	1.22597	0.686229
1.17776	2.20397	1.52196						0.912268	0.698793	0.988697
0.530512	0.656813	0.398893						1.1194	1.35617	1.63121
0.805989	0.876299	0.913444						1.21732	1.08749	1.73134
0.812249	1.53258	0.802318						1.3791	1.52325	1.42627
1.5106	1.65889	1.39754						0.985875	1.51313	1.33629
0.944257	1.41324	1.30947						0.558117	0.472682	0.582456
0.490197	0.805719	1.15936						0.954044	1.26146	0.799266
0.868257	0.809134	1.29856						1.06682	1.53121	1.41048
0.785232	1.34133	1.15261						1.72001	1.03913	1.39967
1.11183	1.3297	1.101						1.27343	1.67651	1.60006
2.42289	2.48886	2.4527						0.900302	1.07699	1.08415
0.54982	0.961828	0.951119						0.906313	1.03738	1.02335
0.952387	0.85898	1.12177						0.891078	1.14751	0.79094
0.878037	1.00641	1.23617						0.754019	1.55003	0.793203
0.842492	0.790847	0.97379						1.35237	1.81708	1.50805
1.53885	1.34669	1.17645						0.861227	1.16487	1.19244
0.71401	1.22449	1.0381						2.85185	3.71502	3.27865
1.13367	1.62968	1.07217						1.48728	2.66289	2.77335
0.825893	1.38436	1.08741						1.05776	1.08134	1.00058
0.932516	0.271676	0.341996						0.916979	0.962739	1.22622
1.12967	1.08751	1.50028						0.673757	0.437905	0.611246
1.05775	0.868102	1.64111						1.14418	1.24104	1.11106
0.945197	0.785143	1.28573						0.767781	0.98277	1.54453
0.964854	0.597777	1.24165						1.25416	1.11846	2.52593
1.22296	0.684169	0.536666						1.72887	1.39356	1.97798
1.1655	1.4996	1.6192						1.42114	1.44892	1.41317
0.749985	0.60877	0.769534						1.3733	0.832746	1.99323
1.20142	1.0566	0.747671						0.993112	0.399629	1.17899
0.812876	1.23164	1.09474						0.960869	0.961166	1.17537
1.27866	1.29683	1.15505						0.844126	0.671559	0.921736
1.08128	1.01088	1.8679						0.995276	0.647515	0.9239
1.27812	0.398556	0.426483						1.57832	2.0968	1.27081
1.04302	1.17332	1.41987						0.948148	0.661274	0.631203
0.761718	0.848653	0.981569						1.2824	1.25662	1.62634
1.23524	0.513257	1.19233						0.957589	0.936131	1.36975
0.807418	0.749406	1.15053						1.27843	0.897378	0.795534
0.900253	0.82437	1.22674						0.844069	1.06233	1.20958
3.04621	2.2973	2.99022						0.690651	0.7342	0.775533
0.854208	1.13232	1.02775						0.794645	0.943367	0.679219
1.37543	1.35584	2.41383						0.72095	1.13693	0.746353
1.23705	1.31405	2.55871						0.813316	0.794329	0.888328
2.24324	2.91258	2.43314						0.739297	1.32831	0.651334
1.17368	1.0263	1.01142						0.698913	0.763927	0.888537
0.998722	1.51577	0.87894						0.529826	0.839308	0.347498
0.859516	1.06999	0.987193						4.137	3.70162	3.92958
0.766138	0.785414	0.245111						0.573292	0.44705	1.07839
0.740082	0.6959	0.63791						0.922926	0.732062	1.28697
								1.34096	1.08095	1.04109
								3.00226	4.05955	7.41197
								1.09078	1.31354	1.45622
								0.683878	1.04207	1.33603
								0.864761	1.17902	1.75476
								1.27635	0.860095	0.793366
								0.900559	0.91945	0.788247
								0.762861	0.904919	0.978556
								0.604369	0.620453	0.902351
								0.870189	0.731058	0.991447
								0.86505	1.17856	1.28477
								1.52623	0.95375	1.23422
								0.67392	1.60854	1.67876
								0.716564	1.29197	1.02211
								0.497023	1.24602	1.19184
								0.797482	1.10761	1.00304
								0.955462	0.512291	0.674428
								0.374772	1.40075	0.990339
								1.52774	1.78159	1.4937
								0.874238	0.798769	0.986582
								0.745262	1.10656	1.03091
								1.36092	1.21566	1.15849
								1.07786	1.58396	1.71205
								0.772616	1.84	0.821633
								1.10254	0.9964	0.802658
								1.22368	1.33712	1.52506
								1.12846	1.56127	2.60025
								1.05676	1.45244	1.61741
								0.708606	1.50891	1.25246
								1.03265	1.2868	1.31303
								0.641912	1.23537	1.39819
								1.14579	1.37051	1.49014
								1.27192	1.41772	1.61295
								0.984943	1.05685	1.25649
								1.16983	1.28175	1.08524
								0.830194	0.934917	1.20138
								2.07069	1.93061	2.15647
								0.880316	0.804797	0.685187

## Sheet: Survival
Fig 4A
		d0	d2	d4	d7
M2Cont	mouse10	1	0.916667	0.907407	0.842593
	mouse11	1	0.967213	0.918033	0.901639
	mouse12	1	0.877193	0.842105	0.77193
	mouse13	1	0.891089	0.881188	0.80198
	mouse14	1	0.873016	0.825397	0.809524
	mouse15	1	0.975806	0.951613	0.895161
	mouse16	1	0.933333	0.92	0.906667
	mouse17	1	0.927152	0.880795	0.847682
M2Task	mouse1	1	0.855263	0.802632	0.802632
	mouse2	1	0.95082	0.918033	0.934426
	mouse3	1	0.939394	0.858586	0.848485
	mouse4	1	0.827586	0.793103	0.75
	mouse5	1	0.95082	0.918033	0.885246
	mouse6	1	0.88764	0.88764	0.865169
	mouse7	1	0.929825	0.850877	0.815789
	mouse8	1	0.862385	0.844037	0.853211
Fig 5A
ThCont	mouse10	1	0.889831	0.872881	0.881356
	mouse11	1	0.91875	0.8875	0.85625
	mouse12	1	0.851064	0.861702	0.851064
	mouse13	1	0.931818	0.909091	0.886364
	mouse14	1	0.927835	0.896907	0.876289
	mouse18	1	0.955556	0.955556	0.9
	mouse19	1	0.972222	0.953704	0.916667
	mouse20	1	0.9375	0.910714	0.848214
ThTask	mouse1	1	0.970588	0.970588	0.960784
	mouse2	1	0.97	0.94	0.95
	mouse3	1	0.883721	0.906977	0.918605
	mouse4	1	0.955056	0.955056	0.88764
	mouse5	1	0.933333	0.933333	0.925
	mouse6	1	0.921053	0.894737	0.877193
	mouse7	1	0.952756	0.937008	0.905512

## Sheet: BoutonSize(P&NP)
Fig 4B
M2Cont	P	3.08008	3.2405	3.6918	2.34736	3.78704	6.41192	5.18793	6.65399	3.36423	4.38997	7.55325	4.4278	13.3241	14.1978	6.10075	3.89492	8.09329	3.38778	6.54042	10.4139	4.8625	6.13776	13.1721	3.33209	4.46379	5.15207	5.14395	6.97533	4.52566	4.42295	3.82892	8.17721	5.6031	5.88491	6.70804	6.08661	7.38806	6.53668	3.64662	5.12116	5.32434	5.84765	6.93038	9.17927	5.27225	8.27008	4.32497	3.11434
M2Cont	NP	4.30683	3.16555	2.90169	5.98014	3.04208	2.92796	3.72386	4.34886	3.39845	6.21785	5.45075	3.95852	3.52866	5.41524	4.02283	3.17973	4.63748	3.56858	3.46358	2.7358	4.68623	4.1821	4.7558	3.30634	3.50904	3.00712	12.7174	3.85473	2.34144	3.43567	3.96534	10.5832	3.00444	4.35804	7.62397	5.3118	3.1653	3.70835	2.82914	3.35394	4.36615	3.37818	4.50863	4.28295	3.44554	4.8319	5.74119	5.38767
M2Task	P	8.18306	6.08799	4.69219	9.59835	5.14068	3.08553	5.35197	6.56865	12.3691	3.46671	10.8446	4.99432	6.82439	7.32807	7.24672	2.8435	4.25582	7.10178	4.78195	6.16749	6.1074	7.80593	5.69549	5.02131	5.72939	4.05144	2.90097	2.02212	4.22197	2.48606	4.26825	4.37659	7.57615	3.60952	7.87487	6.78544	7.20858	8.93639	3.45279	4.70969	2.43583	2.6566	3.26348	7.15786	3.49387	3.02245	2.22502	5.3505
M2Task	NP	5.51699	4.25889	4.18557	3.75168	4.91363	3.86944	3.34923	4.68503	2.57089	3.44128	5.92961	3.64355	2.20973	3.382	5.99687	5.11958	3.11063	2.53098	2.48504	4.4114	7.66248	4.04008	3.40351	5.92022	4.91858	5.40405	3.80807	3.96426	2.15445	3.39891	4.39187	16.1369	3.54264	3.11245	3.84857	3.31468	3.14757	4.36368	5.76672	5.68796	8.78075	3.12264	7.70566	3.11158	9.58719	6.65328	6.54376	3.21746
Fig 5B
ThCont	P	5.64429	7.92634	3.23125	4.10488	12.2887	11.1098	10.3054	8.92058	13.265	14.0018	8.7207	6.31653	7.26464	10.2148	4.00482	9.36292	8.25111	8.62744	11.9666	5.90814	5.71362	7.09466	3.42097	3.15336	11.3486	10.8326	7.64502	6.63112	9.91513	2.93305	7.16921	20.6453	7.28497	8.89988	6.44067	7.54451	8.3555	8.89363	7.67074	4.78858	5.36754	3.68772	6.11875	3.73157	9.87007	3.07077	6.09448	4.61961
ThCont	NP	6.50459	3.89942	5.18208	8.61095	11.0194	6.62417	3.15042	3.88908	3.03084	6.30904	3.68526	4.17327	3.09262	3.14158	3.31057	3.05936	3.74723	4.64413	4.59476	7.91573	4.29135	3.88312	7.32298	3.62041	4.85604	3.63932	3.30232	4.04505	3.65702	3.10847	7.52665	4.33669	3.40905	4.17503	3.85178	4.33896	2.83413	8.18647	3.6046	5.35799	7.51829	2.99805	2.54186	3.00706	7.31031	3.4631	6.16043	4.46867
ThTask	P	4.92638	7.70713	4.63957	4.76162	7.3393	7.25097	5.19317	7.20653	12.0461	5.4966	7.2344	8.31599	12.3644	5.73558	6.22185	6.87379	4.90696	6.02861	9.38965	10.8197	6.42746	2.32683	5.74763	8.49009	4.60709	3.4475	4.98451	5.9902	6.59809	3.99669	4.40673	8.67013	5.48501	7.42408	8.72939	4.31728	9.26664	6.35033	13.2836	4.90479	12.4502	9.2577	8.59826	9.53705	5.41902	5.91374	18.3918	14.6336
ThTask	NP	4.29642	6.47891	3.56536	4.47081	3.14205	4.78539	4.88311	6.77412	6.87127	3.19817	4.76674	4.39906	3.68776	3.9192	4.7809	3.49943	5.07154	8.75519	3.71509	4.18683	3.8576	2.99243	6.8888	4.32254	4.18065	2.82324	3.5234	4.69992	3.84133	14.7683	11.779	3.14406	2.59518	3.12149	8.47699	11.3309	3.22669	8.65358	2.0903	3.02959	6.31305	3.98187	4.34691	8.10733	7.46192	12.5086	2.53914	6.82791
[truncated: 691 more columns]

## Sheet: Survival(Large)
Fig 4C
		d0	d2	d4	d7
M2Cont	mouse10	1	0.972222	0.972222	0.972222
	mouse11	1	1	1	0.97561
	mouse12	1	1	1	0.947368
	mouse13	1	0.970588	0.970588	0.941176
	mouse14	1	0.952381	0.952381	0.904762
	mouse15	1	1	0.97561	0.95122
	mouse16	1	0.92	0.96	0.92
	mouse17	1	0.98	0.96	0.94
M2Task	mouse1	1	0.96	0.96	0.92
	mouse2	1	1	0.97561	0.97561
	mouse3	1	1	0.969697	0.969697
	mouse4	1	0.923077	0.871795	0.846154
	mouse5	1	1	1	1
	mouse6	1	0.966667	1	1
	mouse7	1	0.973684	0.947368	0.947368
	mouse8	1	0.972222	1	1
Fig 5C
ThCont	mouse10	1	0.974359	0.948718	0.948718
	mouse11	1	1	0.981132	0.981132
	mouse12	1	0.903226	0.903226	0.903226
	mouse13	1	1	1	1
	mouse14	1	1	1	1
	mouse18	1	1	1	0.966667
	mouse19	1	1	0.972222	0.944444
	mouse20	1	0.945946	0.945946	0.891892
ThTask	mouse1	1	1	1	1
	mouse2	1	0.969697	0.939394	0.939394
	mouse3	1	1	1	1
	mouse4	1	0.933333	0.933333	0.933333
	mouse5	1	0.95	0.95	0.95
	mouse6	1	0.921053	0.894737	0.868421
	mouse7	1	1	0.97619	0.952381

## Sheet: Survival(Small)
Fig 4C
		d0	d2	d4	d7
M2Cont	mouse10	1	0.861111	0.805556	0.722222
	mouse11	1	0.926829	0.853659	0.804878
	mouse12	1	0.815789	0.736842	0.631579
	mouse13	1	0.794118	0.735294	0.588235
	mouse14	1	0.809524	0.666667	0.714286
	mouse15	1	0.95122	0.926829	0.878049
	mouse16	1	0.92	0.84	0.84
	mouse17	1	0.94	0.86	0.76
M2Task	mouse1	1	0.76	0.64	0.76
	mouse2	1	0.878049	0.829268	0.878049
	mouse3	1	0.848485	0.757576	0.727273
	mouse4	1	0.717949	0.666667	0.641026
	mouse5	1	1	0.95	0.95
	mouse6	1	0.833333	0.833333	0.766667
	mouse7	1	0.868421	0.710526	0.684211
	mouse8	1	0.75	0.722222	0.722222
Fig 5C
ThCont	mouse10	1	0.769231	0.769231	0.794872
	mouse11	1	0.773585	0.698113	0.622642
	mouse12	1	0.741935	0.774194	0.741935
	mouse13	1	0.793103	0.758621	0.724138
	mouse14	1	0.8125	0.75	0.6875
	mouse18	1	0.933333	0.933333	0.8
	mouse19	1	0.944444	0.916667	0.888889
	mouse20	1	0.918919	0.837838	0.783784
ThTask	mouse1	1	0.911765	0.911765	0.911765
	mouse2	1	0.969697	0.939394	0.969697
	mouse3	1	0.724138	0.793103	0.793103
	mouse4	1	0.933333	0.933333	0.766667
	mouse5	1	0.875	0.85	0.825
	mouse6	1	0.921053	0.868421	0.842105
	mouse7	1	0.944444	0.916667	0.888889

## Sheet: Averaged
Fig 4D
		Turnover	Formation	Elimination
M2Cont	mouse10	0.0959446	0.0963068	0.0955824
	mouse11	0.086105	0.0943957	0.0778143
	mouse12	0.13594	0.121518	0.150362
	mouse13	0.132894	0.124708	0.141081
	mouse14	0.100873	0.109937	0.0918086
	mouse15	0.0609161	0.0652062	0.0566259
	mouse16	0.0724675	0.0747475	0.0701876
	mouse17	0.105487	0.108926	0.102049
M2Task	mouse1	0.120299	0.111379	0.12922
	mouse2	0.125051	0.154994	0.0951079
	mouse3	0.0969232	0.0991611	0.0946853
	mouse4	0.15909	0.149131	0.169049
	mouse5	0.112559	0.13372	0.0913972
	mouse6	0.118578	0.136966	0.100189
	mouse7	0.1071	0.104363	0.109837
	mouse8	0.146016	0.16382	0.128212
Fig 5D
ThCont	mouse10	0.0863887	0.0836262	0.0891513
	mouse11	0.0578431	0.0450224	0.0706638
	mouse12	0.122679	0.125114	0.120245
	mouse13	0.0980062	0.103688	0.0923243
	mouse14	0.0951703	0.0876008	0.10274
	mouse18	0.0703615	0.0652431	0.0754798
	mouse19	0.0874144	0.0997724	0.0750565
	mouse20	0.057431	0.0393443	0.0755178
ThTask	mouse1	0.0417807	0.0387147	0.0448467
	mouse2	0.0545912	0.0708805	0.0383019
	mouse3	0.0539163	0.0568213	0.0510112
	mouse4	0.070859	0.0729733	0.0687447
	mouse5	0.0686542	0.0644523	0.072856
	mouse6	0.102258	0.103783	0.100734
	mouse7	0.0582156	0.0571227	0.0593086

[truncated: 4 more sheets: Formation, Elimination, Survival(d0-2_form), Survival(d2-4_form)]
